# Supplementary material
Source: PubMed Central journal article supplement (PMC4676955)
Supplement: NIHMS700067-supplement-Supp_TableS1-S6.pdf [file NIHMS700067-supplement-Supp_TableS1-S6.pdf]

**Supplementary Table S1: List of primers used for RT-PCR MYB-NFIB transcript detection and for the validation of mutations using amplicon resequencing (MiSeq), and Nanostring Codesets.**

**Primer sets used for MYB-NFIB transcript detection (Fehr et al., 2011)**

| Set | MYB primer (exon)/sequence         | NFIB primer (exon)/sequence      | Exons tested |
|-----|------------------------------------|----------------------------------|--------------|
| 1   | 1910 F (14): AGCTCCGTTTTAATGGCACC  | 1096R (8c): GGGTATAAATGCCTGCCGTT | 14-8c        |
| 2   | 1925 F (14): GCACCAGCATCAGAAGATGA  | 1197R (9): CCGGTAAGATGGGTGTCCTA  | 14-9         |
| 3   | 1925 F (14): GCACCAGCATCAGAAGATGA  | 862R (8a) GCCAGGCACTTTCCCTACTAC  | 14-8a        |
| 4   | 1693 F (12): GCAGGATGTGATCAAACAGG  | 1197R (9): CCGGTAAGATGGGTGTCCTA  | 12-9         |
| 5   | 1432 F (10): CTCAGACTTGGAAATGCCTTC | 1197R (9): CCGGTAAGATGGGTGTCCTA  | 10-9         |
| 6   | 1334 F (9): CAGGGCACCATTCTGGATAA   | 1952R (9): GTGCTGCAATTGCTGGTCTA  | 9-9          |
| 7   | 1334 F (9): CAGGGCACCATTCTGGATAA   | 1197R (9): CCGGTAAGATGGGTGTCCTA  | 9-9          |

**NanoString Codeset design**

| Definition             | Identifier  | Target Sequence                                                                                                   | Comments                     |
|------------------------|-------------|-------------------------------------------------------------------------------------------------------------------|------------------------------|
| Endogenous             | MYB_5prime  | CCGCGCCCGCGCGCCATGGCCCCAAGACC<br>CCGGCACAGCATATATAGCAGTGACGAGGAT<br>GATGAGGACTTTGAGATGTGTGACCATGACTA<br>TGATGGG   | targets<br>ex1-2<br>junction |
| Endogenous             | MYB_3prime  | AACTGTTGCATGGATCCTGTGTTTGAACCTGG<br>GGAGACAGAAACTGTGGTTGATAGCCAGTCA<br>CTGCCCTAAGAACATTTGATGCAAGATGGCCA<br>GCACT  | targets<br>3'UTR             |
| Endogenous             | NFIB_5prime | GGTCAATCTTCAGAGGTCTCTGTCTTCTCCAC<br>CAAGCAGCAAAAGACCCAAAACATATCCATA<br>GATGAAAATATGGAACCAAGTCTACAGGAGA<br>CTTT    | targets<br>ex5-6<br>junction |
| Endogenous             | NFIB_3prime | GGTGCAAAAGCGACTGTTCTGCCTACTGTGA<br>CAAACCTCAACTTACACAGGTTCCCTCTCTA<br>ACTTCCACCTGGGTTGCAAGCTGAACTCATT<br>ACTGG    | targets<br>3'UTR             |
| Control (Housekeeping) | POLR1B      | GGAGAATCTCGGCCTTAGAATACTTTGGTGAGA<br>TGTTAAAGGCTGCTGGCTACAATTTCTATGGC<br>ACCGAGAGGTTATATAGTGGCATCAGTGGGC<br>TAGAA |                              |
| Control (Housekeeping) | TUBB        | TGGTGGATCTAGAACCTGGGACCATGGACTC<br>TGTTTCGCTCAGGTCCTTTTGGCCAGATCTTTA<br>GACCAGACAACCTTTGATTTGGTCAGTCTGGG<br>GCAGG |                              |
| Control (Housekeeping) | NAGA        | AAAGGAGACCTTGGCTCCCTCAGGTCACCAAT<br>AAACCTGTTCTTTAATCAAGTAGTTGTAATATG<br>GACCTGGGGTACCTTTAGTTAGGGACTCTGGT<br>GGC  |                              |
| Control (Housekeeping) | NPAS1       | AGCGCTCCTTCTTTGTCCGCATGAAATCCACG<br>CTACCAAGAGGGGGCTGCACGTCAAGGCCT<br>CAGGGTACAAGGTCATCCACGTGACTGGGCG<br>CCTTCG   |                              |
| Control (Housekeeping) | B2M         | CGGGCATTCTGAAGCTGACAGCATTCTGGGC<br>CGAGATGTCTCGCTCCGTGGCCTTAGCTGTG<br>CTCGCGCTACTCTCTTTCTGGCCTGGAGGC<br>TATCCA    |                              |
| Control (Housekeeping) | WAS         | GGCCGAGGAGCACCAGCGGTTGAGCAGAACA<br>TACCCTCCACCCTCCTCCAGGACCACGAGAA<br>CCAGCGACTCTTTGAGATGCTTGGACGAAAAT<br>GCTTGA  |                              |
| Control (Housekeeping) | CD40        | CCCAGGAAGCCATATACACAGATGCCATTGC<br>AGCATTGTTTGTGATAGTGAACAACTGGAAGC<br>TGCTTAACTGTCCATCAGCAGGAGACTGGCTA<br>AATA   |                              |

**Primer sets used for validation of mutations using targeted amplicon resequencing (MiSeq)**

| Primer name        | Sequence                  |
|--------------------|---------------------------|
| F_(BRAF_D594G)     | AGCCTCAATTCTTACCATCCAC    |
| R_(BRAF_D594G)     | TCTTCATAATGCTTGCTCTGATAGG |
| F_(FGFR2_P253R)    | GGCTGGGCATCACTGTAAA       |
| R_(FGFR2_P253R)    | CAGCCCTCTGGACAACAC        |
| F_(MTOR_R1749G)    | AGATGTCAGCAATCAGCCA       |
| R_(MTOR_R1749G)    | TCCAGACCATGCAGCAAC        |
| F_(MYB_I181V)      | AGGGAAAGGTCTCTGTTAGAAA    |
| R_(MYB_I181V)      | GTTCTTCTGGAAGCTTGTGG      |
| F_(MYB_P687L)      | TCAGGAACTTCTTCTGCTCAC     |
| R_(MYB_P687L)      | AAAGAGGGAGTGCTGAAACC      |
| F_(NFKB2_Y294C)    | GGGCTAAATTAGGCTAAGGACTC   |
| R_(NFKB2_Y294C)    | TTCCACCAGAGGGTAATAGGT     |
| F_(PTPN11_A72V)    | CCTCCCTTTCCAATGGACTTTT    |
| R_(PTPN11_A72V)    | GCACAGTTCAGAGGATATTTAAGC  |
| F_(SF3B1_R625H)    | CTCGCTTGCCAGGACTTC        |
| R_(SF3B1_R625H)    | CTCATGACTGTCCTTTCTTTGTTAC |
| F_(TSC2_L823M)     | GAGATGGTCTACTGCCTGGA      |
| R_(TSC2_L823M)     | GGACTCACTGGACAGGAACT      |
| F_(USP6_R133K)     | TGGGCTGACTGCCATTT         |
| R_(USP6_R133K)     | AGGCTTACTTGGCTCCATATC     |
| F_(VRK3_N451H)     | TTAAGCCTCACAAAGCTCTTCC    |
| R_(VRK3_N451H)     | GGTTGTCTTGACCACAGAG       |
| F_(ALOX15_G135S)   | CATCCTGCGCCTCTTC          |
| R_(ALOX15_G135S)   | GGTTCTGCAACTGGATCTCT      |
| F_(ASB4_C307Y)     | CGCCGAAGCCAATCTCAT        |
| R_(ASB4_C307Y)     | CTGCCATTTGAATCTTCTCAAC    |
| F_(ATP1B2_G162S)   | CGCTATTACGAACAGCCAGATAA   |
| R_(ATP1B2_G162S)   | ATCCTTCCCTCCATTCAACCCT    |
| F_(C1QTNF9B_C243S) | GCATCTCTGGTGTGCAGTATT     |
| R_(C1QTNF9B_C243S) | CCTTCTTCAGATGTGCCATTA     |
| F_(CAPZB_E247K)    | CTGAGAGAAAGCAGCAGAGAAG    |
| R_(CAPZB_E247K)    | TCTCTGACTTGGAATGTTTCTGT   |
| F_(CASQ1_E378G)    | GGACTTAGCTTCCGTCCCT       |
| R_(CASQ1_E378G)    | GGCTGAAAGATGGTTGCCATA     |
| F_(CHAC1_T125M)    | GGGTCAGCGGGATTGATAAAG     |
| R_(CHAC1_T125M)    | AAGAGCCTATGAGCTCTCTCTG    |
| F_(CRY1_I481S)     | AACAGCTGCCAAAGAAACAAAG    |
| R_(CRY1_I481S)     | CTGGAATGCACCAGAAGGTATC    |
| F_(GFM2_I281T)     | GATAAGTGGTGCACACATTGG     |
| R_(GFM2_I281T)     | AGTGGTGGATGTAGTAATGAAAGA  |
| F_(GPR142_G290D)   | GGTTGACCGCTACACTGC        |
| R_(GPR142_G290D)   | GGGATGAAATAGACAGTGAGACAG  |
| F_(ILDR2_C222Y)    | TGTCAGGTAGAGAGGTAGACATT   |
| R_(ILDR2_C222Y)    | TTTGTTGGCCTGGTGCT         |
| F_(LRCH4_G250R)    | GACTTACCAGGGACTGAAACT     |
| R_(LRCH4_G250R)    | CTTGGATAGCTGAGCAGGAT      |
| F_(OR2B11_L212S)   | TTGTGTCGTCCCTTGAG         |
| R_(OR2B11_L212S)   | GCAGGTGCTGAACAACTTT       |
| F_(PGF_V59G)       | GCACACAGTGCAGATTCTCAT     |
| R_(PGF_V59G)       | TCTCTGCTGGCCTGACC         |
| F_(PLXNB2_G70V)    | CAGCAGCTGGTTGACATTG       |
| R_(PLXNB2_G70V)    | CACCTGGCTGTGGATGAG        |
| F_(PTPN7_R339W)    | ACCCTTGGCTCCTAGTGAA       |
| R_(PTPN7_R339W)    | CTCCCTCCCTCCTAGAAATGT     |
| F_(SLCO2A1_C450S)  | GAGGTTGCAGAGCTCATGTT      |
| R_(SLCO2A1_C450S)  | GGTCTTGCTTTGTTTGATTCCC    |
| F_(TLN2_R93Q)      | CAGTGTGAAATTTGTATGTGGTTTG |
| R_(TLN2_R93Q)      | GACATAATGAAGGTGTATGAATGCT |
| F_(TRIM55_I324T)   | ATCTCGGAAGCATCAAAGGC      |

| Primer name           | Sequence                      |
|-----------------------|-------------------------------|
| R_(TRIM55_I324T)      | TTTCCTCCCACCCAACCTCT          |
| F_(WDR87_Y417N)       | GTGAGGTGCCTAAGAGATACTTG       |
| R_(WDR87_Y417N)       | CCACTGAGGATGGCTTGT            |
| F_(ABCB7_E731D)       | TGACTTAGCACGAACAGTTTCC        |
| R_(ABCB7_E731D)       | GGTTTGCTTGCTAACCCCTCATA       |
| F_(ANKRD29_T105N)     | GAAACATAAAATTCGTACCATAGATGAGG |
| R_(ANKRD29_T105N)     | GTCAGGTACAACCTGCCCTATTC       |
| F_(CAPZB_V246I)       | CTGAGAGAAAGCAGCAGAGAAG        |
| R_(CAPZB_V246I)       | TCTCTGACTTGGAAATGTTTCTGT      |
| F_(CDH3_W591*)        | TGCTGAACATCACGGACAA           |
| R_(CDH3_W591*)        | TAGGAACGTGTGCAGAATCC          |
| F_(CDK11A_SpliceSite) | TCTGATCGATTTCCGAATTCCC        |
| R_(CDK11A_SpliceSite) | CTTGGTGCCAAGGTGAGT            |
| F_(COPA_SpliceSite)   | AAAGAAGCAAGCCCAGAATAATG       |
| R_(COPA_SpliceSite)   | CTTATCTCCAGAAGAAGGGCTATC      |
| F_(DLG4_K722R)        | GAGCTCTTTCTAATCCGAGCAA        |
| R_(DLG4_K722R)        | TCAGGTGGGTCCAGTCTC            |
| F_(DND1_P76L)         | GAGCTGTAGCGGGCATAG            |
| R_(DND1_P76L)         | GGCCTTGCATACCCTCTT            |
| F_(ENO3_K427E)        | GAGGCTGTTAGGTTGGAAGTT         |
| R_(ENO3_K427E)        | GGTTGGCACCAGTGTTTATTTTC       |
| F_(GRIN2A_I836T)      | GTGTAAGTACCCTGCTGATG          |
| R_(GRIN2A_I836T)      | AACGAGAAGAACGAGGTGATG         |
| F_(GRIN2B_H1187Q)     | AGCTGCGGCAGAAGTTG             |
| R_(GRIN2B_H1187Q)     | TCTACAAGGAGCGGAGTGAT          |
| F_(HMX2_N269H)        | GGGACAGTTCGCTGCTG             |
| R_(HMX2_N269H)        | GGAGCCCTGCTTACAGTACA          |
| F_(HSDL1_M184L)       | CAGCTGAGGAGTGGGTTTG           |
| R_(HSDL1_M184L)       | TGGTAAATAACGTGGGTGTGT         |
| F_(LRRC36_A583V)      | CCCGAGATTTGCTTCTGTCTT         |
| R_(LRRC36_A583V)      | GTTGTAGTCTGCTGCTCTGT          |
| F_(MAML3_P727S)       | TGGGCCCCGCTGATCAAT            |
| R_(MAML3_P727S)       | GCATCTCCCTCTCTTTGTCTT         |
| F_(MAP1B_R64*)        | CTCCCTGAAAGCCTGAGAAATA        |
| R_(MAP1B_R64*)        | GGGACTTCAGGAGAGAATCTTG        |
| F_(MAP4K4_SpliceSite) | ACTGTCCCATTATCTTGTCCCTT       |
| R_(MAP4K4_SpliceSite) | TTTGTACCACACAGGAGTCTTC        |
| F_(MEX3C_A383P)       | GCCACCTTCAAAGCTTACATC         |
| R_(MEX3C_A383P)       | CAGACCCACACCTACATAGTAAC       |
| F_(MTPP_Y341*)        | CCTAGGAGAACACCCCTTTGTAAAT     |
| R_(MTPP_Y341*)        | ATCTCTTCTTTCTTTCGCAGTCC       |
| F_(MYO5A_R1226H)      | CATCAAGCTCCTCGCTCAC           |
| R_(MYO5A_R1226H)      | AGTTGAGGATGACAGCAATGAA        |
| F_(NHSL2_Y715*)       | CACTACACCTTCCCAACTCTC         |
| R_(NHSL2_Y715*)       | TCAGGTACCACTGGACGTA           |
| F_(PGC_V5G)           | GCTTTAGGCTCCCATCCAG           |
| R_(PGC_V5G)           | GAAAGAGTGCCAGGTCTTC           |
| F_(QRICH2_Q521*)      | AGGTTGAGCCAAATCACTCTG         |
| R_(QRICH2_Q521*)      | TGGTACAGCCTGGTGTAGAT          |
| F_(RNF4_G138*)        | CACTCACGTGACAGGGTATAAT        |
| R_(RNF4_G138*)        | GGAAGATCCTGTCTCATCCAAT        |
| F_(SETD1B_SpliceSite) | GTTCTGCAAGAGCCACATTC          |
| R_(SETD1B_SpliceSite) | GCATGTCTGCGATCACCT            |
| F_(SH3RF3_V314M)      | GGAAGTGCAGGACGAGATTC          |
| R_(SH3RF3_V314M)      | GGGCTTGAAGGTCAGGTG            |
| F_(SHQ1_Y284*)        | GTTTACTCAGCACAGTCACTA         |
| R_(SHQ1_Y284*)        | GAAGAGAAGTATCAGCTACGAAA       |
| F_(SKAP2_D293A)       | GTAATCACATCACCACGCTTAAA       |
| R_(SKAP2_D293A)       | GATCTAGGGCATCATTTAATTTCTACTG  |
| F_(SLC16A14_N313D)    | ACAAATTGACGATTTCTGGGA         |
| R_(SLC16A14_N313D)    | CTCCGGATTCTGAAGACTGT          |

| Primer name            | Sequence                    |
|------------------------|-----------------------------|
| F_(SLC19A1_L448*)      | CTGTGCTGCCTTCTCCTC          |
| R_(SLC19A1_L448*)      | GTAGGGTGCCAGTGTCC           |
| F_(SLC25A1_SpliceSite) | GATACTGAAGTGAGAGGCACAG      |
| R_(SLC25A1_SpliceSite) | CCTGCCTGCTGATGTCC           |
| F_(SLITRK2_R646H)      | CTGAAGTTCCAAGTCTGTCTT       |
| R_(SLITRK2_R646H)      | ATCGTGAGTCTCAGTGTGTAAG      |
| F_(SMARCA5_R186*)      | GTAGGCTTAGATGAAGAGATTGCC    |
| R_(SMARCA5_R186*)      | AACTACCAACACATACCATTTTCATC  |
| F_(SPOCD1_S594*)       | GGGAGAGAAGAATCATAGCAG       |
| R_(SPOCD1_S594*)       | AGCACAGCCTCAATTCC           |
| F_(STAG3_A646V)        | CCACAGCACACCATCTTCT         |
| R_(STAG3_A646V)        | GCGGTCAGTCAGCAAATCTA        |
| F_(THSD4_E723Q)        | GAGTGCAGCAAGACCTGTG         |
| R_(THSD4_E723Q)        | CTGCGTACCGAGGTCCA           |
| F_(TLN1_L1481S)        | TGCCTCACCTCCCTCTAC          |
| R_(TLN1_L1481S)        | CCAATAGCCAAGCTGGACA         |
| F_(VCAN_R155M)         | CTAAGTTGATACATTGCTCCAATGAG  |
| R_(VCAN_R155M)         | CTGCTCTGGAGTTGCTATGAC       |
| F_(WDR81_T1726R)       | CCGCAAGAGCGTCTTCTTC         |
| R_(WDR81_T1726R)       | CCCAAAGTCCGCAGCATTAA        |
| F_(ZBTB8A_S326I)       | TGTGGTGAAGCGGAAGGCAGAC      |
| R_(ZBTB8A_S326I)       | CCAGCCTGGCAACAAGAGTGAAAC    |
| F_(ZNF667_D624Y)       | TTGCATGTATATGGCTTCTCTC      |
| R_(ZNF667_D624Y)       | GAACATCAAAGAATTCATACTGGAG   |
| F_(MLL2_InDel)         | GGCAGACGGGTGAAAT            |
| R_(MLL2_InDel)         | CTATCAGCGAGCACCCCTATC       |
| F_(CDH1_InDel)         | AACAAAGACAAAGAAGGCAAGG      |
| R_(CDH1_InDel)         | AAATCCTGGGTGGATGTTACC       |
| F_(LHX5_InDel)         | TGAGGCCGGTCTCCTG            |
| R_(LHX5_InDel)         | CCCAAAGAGACGGACAACCTC       |
| F_(SLAIN2_InDel)       | GCGCAGTTCTGGTTTCATCTT       |
| R_(SLAIN2_InDel)       | GAGGTGAATTTCTGGGTGACTG      |
| F_(ZMYM3_InDel)        | TTTGCACCTACCAGTGAGC         |
| R_(ZMYM3_InDel)        | GGGACAAATCCAGCCTCAG         |
| F_(OR6Y1_V129L)        | GCAGTCATGAGTCCACAGAA        |
| R_(OR6Y1_V129L)        | GACAAGAGTATTTCTTCAATGGC     |
| F_(XPNPEP2_E209D)      | CTCCAAGGCTCTAACAGACAG       |
| R_(XPNPEP2_E209D)      | AGTTTGCCACCTACGGAATAG       |
| F_(ZNF3_N184S)         | TCTCTGATGTTGAATAAGGTCTGAA   |
| R_(ZNF3_N184S)         | AAGTGACAGTTGAGGAGAAGC       |
| F_(ARAP1_S207C)        | AGGCCATCCACCCAGAG           |
| R_(ARAP1_S207C)        | CCACTAAGGAGGAGGAGTTCATT     |
| F_(MKI67_S1447N)       | GGGCTTGTCACTGCATACT         |
| R_(MKI67_S1447N)       | CACAGATAAAGTACCAGGAGGTG     |
| F_(CES1_I50V)          | CGAGGTGGCATTCTTCACAAAG      |
| R_(CES1_I50V)          | ATGTCCAGCAGGGCATCC          |
| F_(COA6_R23G)          | CCCTCTATGGAAAGTAAATGGTAGC   |
| R_(COA6_R23G)          | TCGACGGGAGGAAACTGT          |
| F_(PMCH_A54V)          | GTCACATTGCCACTTACCTTTG      |
| R_(PMCH_A54V)          | TTCAGCATCCAAGTCCATAAGA      |
| F_(SMYD2_K231R)        | TTCTCTTCTGACTGACAGTGTG      |
| R_(SMYD2_K231R)        | AGATCTGTCCACATTGCCTTT       |
| F_(TNFAIP_V442G)       | TCTGGCTCCCTGGGTATG          |
| R_(TNFAIP_V442G)       | TCAGGTCTCATGCAGGTT          |
| F_(ZNF132_H22N)        | CATCAAGGAGCTCCCACTC         |
| R_(ZNF132_H22N)        | AGAGATATTAGTGGTAGATGTATCAGG |
| F_(C10orf54_R74H)      | CATGGTGCAGGTGAAGGT          |
| R_(C10orf54_R74H)      | CCGTATTCCTGTATGTCTGTC       |
| F_(OR8K1_N235Y)        | TCTCAGGCTGTAATTTGCTCTT      |
| R_(OR8K1_N235Y)        | CTGGACTTGGGTTGCAAGTA        |
| F_(ERVV-1_SpliceSite)  | GGAGAGCTTCCAATTCCTCTTC      |

| Primer name           | Sequence                             |
|-----------------------|--------------------------------------|
| R_(ERVV-1_SpliceSite) | TGGTTCGATGGAGTGTTTAGTG               |
| F_(OR2T2_R132W)       | GCAGTTCAGATCTTCTCTACC                |
| R_(OR2T2_R132W)       | GTGACAGGAGTCAGCATGAA                 |
| F_(GOLGA8R-W275R)     | TCTGATGCCAGTCCTGCT                   |
| R_(GOLGA8R-W275R)     | GAAGGAGAGGGCAGCCT                    |
| F_(MUC16_S13577N)     | GGAAGAGACTCCAACCACATC                |
| R_(MUC16_S13577N)     | GCAGCCACCAAAGTGGA                    |
| F_(CPA2_R394S)        | GGAAGCATTGACTGGTCCTAT                |
| R_(CPA2_R394S)        | TTTAATGGCTCTTGTCTTCCC                |
| F_(PCDHGB6_H290Y)     | CCCTGTGTTGCAAGTGACA                  |
| R_(PCDHGB6_H290Y)     | CGTCTTCGCTTCCACTTC                   |
| F_(INPP5D_T848M)      | GCAGCTGCCCATCTACAC                   |
| R_(INPP5D_T848M)      | TATTGACAGCTTTGCTGAGAG                |
| F_(TMEM26_G327C)      | TCGTGGAGGTGACTGG                     |
| R_(TMEM26_G327C)      | TTGCAACTCTACCGCTTGG                  |
| F_(RALY_G231S)        | TAAGGTGCTGCCCTAGACA                  |
| R_(RALY_G231S)        | TGCCTCAGAAGTTGTGTTCTC                |
| F_(GPRASP2_S56F)      | GCCTGAGAGAGAGAATGATGT                |
| R_(GPRASP2_S56F)      | TTCTTGAGCCTCCGTTT                    |
| F_(TMEM155_T110P)     | AAGGCAGTTATATATCCAGCTACAA            |
| R_(TMEM155_T110P)     | CCCACAAGAAGAAGGAGGAAG                |
| F_(RBMX_G115R)        | AGCTTGCACTCCCTAACTTATAC              |
| R_(RBMX_G115R)        | GAACAAGCCACCAAACCATC                 |
| F_(MRS2_Q161H)        | AAATGAAGCAGTCTTCTCCCA                |
| R_(MRS2_Q161H)        | TTGAAAGATTGCAGTGAACACC               |
| F_(TFR2_S383G)        | CAGCCGAAGATGTTGTTGATG                |
| R_(TFR2_S383G)        | GATTTGGACTCTTCTGGGTCTC               |
| F_(AKAP2_E840EAE)     | AATGCCATTCAACAAGCCATAG               |
| R_(AKAP2_E840EAE)     | GGCAGAATCTTTGGTAATACATCC             |
| F_(NFAT5_InDel)       | TGCAAGCAGGGAGTTTCA                   |
| R_(NFAT5_InDel)       | GGCTTACACCACTCTGAATTTG               |
| F_(USP9X_Y1477*)      | AGCATTGCTAATATGTAATCCCTTT            |
| R_(USP9X_Y1477*)      | TCACACAGCCAACAGCTAAT                 |
| F_(ATP10D_R606Q)      | AAATCCACCAATGGAACCTTTGT              |
| R_(ATP10D_R606Q)      | TTATCCATATATCAAGCTCAGTACAGATA        |
| F_(MAGT1_N164K)       | GATCCACCGGGCAATCT                    |
| R_(MAGT1_N164K)       | ATGCCTAAATTTCAAGATGTTAACTG           |
| F_(PCMTD1_P342S)      | TTTAACTCCTAACAAATGCTACA              |
| R_(PCMTD1_P342S)      | AGATCACAAATGAAGCAATGAA               |
| F_(PDE3A_SpliceSite)  | AGATTGGAACAACCTGATTATCTTT            |
| R_(PDE3A_SpliceSite)  | CCCCTGGCTGAAAGTGTTA                  |
| F_(STAG2_InDel)       | TTGTGAATTCATTGGCGTGTTAG              |
| R_(STAG2_InDel)       | CATCTCAAATCTAAGACAATATGCAGAA         |
| F_(FGF20_G50C)        | GCAGGATCTGCAGGTGGAAG                 |
| R_(FGF20_G50C)        | GGCCAGCAGGTGGGTTT                    |
| F_(TMPRSS11F_S80P)    | CACCCACATTCAAAGTGATGC                |
| R_(TMPRSS11F_S80P)    | CCTTTTCAAGATGATAAGTCTTTCTATTACC      |
| F_(ZNF479_C67R)       | CTTCATTCGCTCTCACCTAC                 |
| R_(ZNF479_C67R)       | ATCCTCTAAGCATAATACTAATTTGG           |
| F_(CCDC22_SpliceSite) | CCCAGGCCTCACATCCG                    |
| R_(CCDC22_SpliceSite) | GATTCCGGTCCGCCTCCTC                  |
| F_(TENM4_T216M)       | GCGCACCTGGTCTCCA                     |
| R_(TENM4_T216M)       | CTCTCGCACGCCACA                      |
| F_(SEMA5B_Q79*)       | AGTCTGGTACCTGCTG                     |
| R_(SEMA5B_Q79*)       | CCTGGCCTGTGTCTCT                     |
| F_(FBXW7_D642G)       | TTGAGGCTCTGATCCGCCAC                 |
| R_(FBXW7_D642G)       | TTGGTTTTTGTCTAGGTCCCAAC              |
| F_(PARD3B_R444*)      | AAACTATCTAGTGTAGAAGGAGATAACAAG       |
| R_(PARD3B_R444*)      | CATTACCAACTCTCGGGGC                  |
| F_(USP9X_Y1757*)      | TCGTTTTTAAAGTACGAATGTGAAGAATCTTTTACG |
| R_(USP9X_Y1757*)      | CATTAATGTAATCAAATTAACAAAACCTGGA      |

| Primer name        | Sequence                                |
|--------------------|-----------------------------------------|
| F_(OSBPL1A_W251*)  | TCGTATTTCAAATTTATACAGTGAAATTTGATAAGTG   |
| R_(OSBPL1A_W251*)  | TATGACTGTCCTCACTTAATTACTTTTTATCAGTCAAGC |
| F_(CPS1_D1402Y)    | TGTTCCATAAAAATAAGAAATCACTGTGATACGG      |
| R_(CPS1_D1402Y)    | ATCCTCTAAATTTATTCAGAAAACAGTATGCCTAGTTC  |
| F_(RASA1_L481P)    | GGATCAAGAACAAGTACTCAATG                 |
| R_(RASA1_L481P)    | CTCATGTCAAAACTTATTTAAATATATATCAC        |
| F_(HCRTR2_R248H)   | GACTTTTCATCCTAGGTGAAATTTATCCC           |
| R_(HCRTR2_R248H)   | TTGGAAGGAATAACAAATAACAAATTATGTG         |
| F_(VPS26A_M261L)   | GTTATGTGACTATATTAATCATCTTTAGAATTAAGTAG  |
| R_(VPS26A_M261L)   | CCAGCCCAAGTGGCACCATAC                   |
| F_(IQSEC2_A1269S)  | GAGCCCAAGCTGGGGCAAG                     |
| R_(IQSEC2_A1269S)  | CTTCATCTGCTTCTTCCACGC                   |
| F_(LARP1_R1002P)   | AGCAGGAGGTGGCGGC                        |
| R_(LARP1_R1002P)   | GACTCTTACCCACCTACCCC                    |
| F_(WDR37_L72P)     | TCTTCTTCTGCAGGATTCTAAACTGC              |
| R_(WDR37_L72P)     | GTGATGAATGTCTATTCATAAAATTTGACTATGGA     |
| F_(SOS1_M269K)     | GTAATGTAGGCTTTTATGCAGACTTTTCG           |
| R_(SOS1_M269K)     | TGTGTTTTCCCCAAACAGGATGTAG               |
| F_(ARAF_A379V)     | TCCCCACCTCTGACTCTGC                     |
| R_(ARAF_A379V)     | GGGCAGTCTGCCGGGCC                       |
| F_(CACNA1G_T1404M) | CAGGGTCAAGGGACAAGGG                     |
| R_(CACNA1G_T1404M) | AGCTGGCCCCCAGAACC                       |
| F_(SLIT2_R332*)    | CATTGCAGACGTTTGGAAACAGAACAC             |
| R_(SLIT2_R332*)    | TTTAAGCTGTCAAACACTTATATACTCATACTTAAG    |
| F_(CDH23_InDel)    | CTCCCCACCCTTTTCCCTC                     |
| R_(CDH23_InDel)    | GCAAAGACCCAGCCCCTC                      |
| F_(DOPEY1_InDel)   | CCTTGTATTTTCAGGAACCACACACAC             |
| R_(DOPEY1_InDel)   | TAGGTTTTGCTCCTGGTTGTTTACC               |
| F_(BRD1_InDel)     | GGGACACTCAGGTCACCGAG                    |
| R_(BRD1_InDel)     | GATGCCCCGTGTGCCTG                       |
| F_(USP9X_InDel)    | TGGAGAGCTTCCAGCTGAACAG                  |
| R_(USP9X_InDel)    | TGAAACATTGAAATGATCAATTATCACATTC         |
| F_(ADAMTS14_P548L) | GCTCAGCAGCAGCAGCC                       |
| R_(ADAMTS14_P548L) | GTTGTTGCAGCTCCGGCT                      |
| F_(GPR116_H603P)   | AGACTCCACATATGTGAAATAATATACCC           |
| R_(GPR116_H603P)   | TCTAAAGCTGAACATCATGGTTGATC              |
| F_(TLN2_V16A)      | GACATTCTAAGTGAGACTGTCCACATCA            |
| R_(TLN2_V16A)      | AAGAAGCCAGTAAATAACCCATGACCTAC           |
| F_(MAP1LC3B_Y113C) | CCTTCTCCTGTTGGTGAACG                    |
| R_(MAP1LC3B_Y113C) | CATGATCTGTGATTGGATGAACT                 |
| F_(BMS1_M976L)     | TAGGGTGGAGGAGGTTTCAG                    |
| R_(BMS1_M976L)     | AATCTTGGCAACAGGCAAGT                    |
| F_(PANK3_I301F)    | AGGACTCCAATTCACATTTTTGA                 |
| R_(PANK3_I301F)    | TTTTTATCAGCAGATTTGACTTTATTT             |
| F_(FUT2_Y150*)     | CCTGCCGGTGCTGCACAG                      |
| R_(FUT2_Y150*)     | GCTCCCGTTCACCTGCAG                      |
| F_(TAF1D_Q125*)    | TTTTTCTCCAAGGTGCGTTT                    |
| R_(TAF1D_Q125*)    | TACCAGCCAACAGGAAGACC                    |
| F_(PRKD1_G598C)    | TCGCTTTTTAAAATATAACTAGCAAAA             |
| R_(PRKD1_G598C)    | TTTTTCATTGGGCTTGACCTC                   |

**Supplementary Table S2: Clinico-pathologic characteristics of breast AdCCs included in this study.**

| Sample ID | Grade | ER | PR | HER2 | Growth pattern     | Age at diagnosis (years) | Tumor size (mm) | Sentinel lymph nodes | Axillary lymph nodes | Neoadjuvant chemotherapy       | Surgery                         | Adjuvant chemotherapy | Radiotherapy | Follow-up (years) | Status                 | Loco-regional recurrence | Distant metastasis           |
|-----------|-------|----|----|------|--------------------|--------------------------|-----------------|----------------------|----------------------|--------------------------------|---------------------------------|-----------------------|--------------|-------------------|------------------------|--------------------------|------------------------------|
| AdCC1T    | 1     | -  | -  | -    | Tubular-cribriform | 57                       | 15              | -                    | 0/7                  | -                              | Breast conservation, mastectomy | -                     | -            | 11                | Alive                  | -                        | -                            |
| AdCC2T    | 1     | -  | -  | -    | Tubular-cribriform | 52                       | 25              | 0/3                  | -                    | -                              | Breast conservation             | -                     | +            | 12                | Alive                  | -                        | Lung; 10 yrs after diagnosis |
| AdCC3T    | 1     | -  | -  | -    | Cribriform         | 62                       | 23              | -                    | 0/15                 | -                              | Breast conservation             | -                     | +            | 7                 | Alive                  | -                        | -                            |
| AdCC4T    | 1     | -  | -  | -    | Tubular-cribriform | 67                       | 35              | -                    | 0/7                  | Adriamycine, Endoxan, Taxotere | Mastectomy                      | -                     | +            | 8                 | Alive                  | -                        | -                            |
| AdCC5T    | 2     | -  | -  | -    | Tubular-cribriform | 66                       | 40              | -                    | 0/13                 | -                              | Breast conservation, mastectomy | -                     | -            | 8                 | Alive                  | +                        | -                            |
| AdCC6T    | 2     | -  | -  | -    | Solid-trabecular   | 77                       | 22              | 0/1                  | -                    | -                              | Breast conservation             | -                     | +            | 3                 | Dead (unrelated cause) | -                        | -                            |
| AdCC8T    | 1     | -  | -  | -    | Tubular-cribriform | 53                       | 17              | 0/3                  | 0/1                  | -                              | Breast conservation, mastectomy | -                     | -            | 3                 | Alive                  | -                        | -                            |
| AdCC9T    | 2     | -  | -  | -    | Cribriform         | 69                       | 45              | -                    | 0/5                  | -                              | Breast conservation, mastectomy | -                     | -            | 4                 | Alive                  | -                        | -                            |
| AdCC10T   | 1     | -  | -  | -    | Tubular-cribriform | 52                       | 25              | -                    | -                    | -                              | Breast conservation             | -                     | +            | 10                | Alive                  | -                        | -                            |
| AdCC11T   | 2     | -  | -  | -    | Tubular-cribriform | 53                       | 24              | -                    | -                    | -                              | Breast conservation             | -                     | -            | 10                | Alive                  | -                        | -                            |
| AdCC12T   | 2     | -  | -  | -    | Solid-cribriform   | 63                       | 20              | 0/1                  | -                    | -                              | Breast conservation             | FEC 100 + taxanes     | +            | 3                 | Alive                  | -                        | -                            |
| AdCC32T   | 1     | -  | -  | -    | Tubular-cribriform | 78                       | 35              | 0/1                  | -                    | -                              | Mastectomy                      | -                     | -            | 3                 | Alive                  | -                        | -                            |

FEC, 5-fluorouracil, epirubicin, cyclophosphamide; -, negative/not performed; +, positive/performed.

**Supplementary Table S3: Whole exome massively parallel sequencing statistics.**

| Sample ID | Total reads | On-target bases (Gb) | Mean target coverage (x) | % target bases at 2x | % target bases at 10x | % target bases at 20x | % target bases at 30x | % target bases at 40x | % target bases at 50x | % target bases at 100x |
|-----------|-------------|----------------------|--------------------------|----------------------|-----------------------|-----------------------|-----------------------|-----------------------|-----------------------|------------------------|
| AdCC1T    | 71357407    | 2.86                 | 57.3                     | 94.83%               | 87.04%                | 78.02%                | 67.51%                | 56.35%                | 45.70%                | 13.96%                 |
| AdCC1N    | 68323351    | 2.75                 | 55.2                     | 94.51%               | 85.98%                | 76.27%                | 65.39%                | 54.28%                | 43.86%                | 13.21%                 |
| AdCC2T    | 70368184    | 2.83                 | 56.8                     | 94.37%               | 85.93%                | 76.43%                | 65.85%                | 54.99%                | 44.75%                | 14.16%                 |
| AdCC2N    | 68962255    | 2.73                 | 54.7                     | 94.74%               | 86.31%                | 76.48%                | 65.33%                | 53.87%                | 43.21%                | 12.80%                 |
| AdCC3T    | 101224987   | 3.90                 | 79.4                     | 93.20%               | 89.06%                | 83.89%                | 78.07%                | 71.68%                | 64.84%                | 30.39%                 |
| AdCC3N    | 103408560   | 3.76                 | 76.5                     | 93.17%               | 88.94%                | 83.81%                | 78.18%                | 72.03%                | 65.31%                | 28.71%                 |
| AdCC4T    | 117732392   | 4.17                 | 84.7                     | 93.36%               | 89.37%                | 84.87%                | 79.94%                | 74.61%                | 68.82%                | 35.72%                 |
| AdCC4N    | 209558130   | 6.42                 | 129.2                    | 94.62%               | 91.26%                | 88.61%                | 85.68%                | 82.51%                | 79.12%                | 59.06%                 |
| AdCC5T    | 92941978    | 3.53                 | 72.2                     | 92.86%               | 89.18%                | 84.11%                | 77.92%                | 70.84%                | 63.04%                | 24.32%                 |
| AdCC5N    | 106278761   | 3.80                 | 77.5                     | 92.96%               | 88.90%                | 83.75%                | 77.92%                | 71.61%                | 64.86%                | 29.86%                 |
| AdCC6T    | 182766162   | 5.69                 | 116.5                    | 89.48%               | 79.78%                | 75.26%                | 71.93%                | 68.86%                | 65.87%                | 50.40%                 |
| AdCC6N    | 131788006   | 5.02                 | 102.2                    | 93.23%               | 89.91%                | 86.21%                | 82.14%                | 77.81%                | 73.16%                | 46.15%                 |
| AdCC8T    | 87761728    | 3.61                 | 74.1                     | 92.47%               | 88.05%                | 82.46%                | 76.44%                | 69.86%                | 62.72%                | 26.34%                 |
| AdCC8N    | 80435347    | 3.16                 | 64.9                     | 91.08%               | 85.32%                | 78.78%                | 71.82%                | 64.32%                | 56.35%                | 19.75%                 |
| AdCC9T    | 119634083   | 4.16                 | 83.3                     | 95.16%               | 92.61%                | 88.86%                | 83.51%                | 76.93%                | 69.62%                | 33.26%                 |
| AdCC9N    | 124827340   | 4.03                 | 80.6                     | 95.32%               | 92.63%                | 88.52%                | 82.67%                | 75.66%                | 68.10%                | 31.23%                 |
| AdCC10T   | 52590857    | 2.17                 | 43.8                     | 93.48%               | 82.99%                | 69.79%                | 55.56%                | 42.42%                | 31.64%                | 7.51%                  |
| AdCC10N   | 51937323    | 2.12                 | 42.7                     | 93.80%               | 83.48%                | 70.09%                | 55.38%                | 41.74%                | 30.68%                | 6.71%                  |
| AdCC11T   | 104867454   | 3.83                 | 78.9                     | 89.87%               | 82.44%                | 77.25%                | 72.23%                | 67.05%                | 61.56%                | 32.42%                 |
| AdCC11N   | 100845413   | 3.90                 | 79.7                     | 93.02%               | 89.27%                | 84.50%                | 79.01%                | 72.90%                | 66.22%                | 30.56%                 |
| AdCC12T   | 112634947   | 4.20                 | 85.9                     | 92.61%               | 88.95%                | 84.37%                | 79.06%                | 73.27%                | 67.13%                | 35.71%                 |
| AdCC12N   | 143970171   | 5.00                 | 101.5                    | 93.66%               | 90.41%                | 87.05%                | 83.13%                | 78.80%                | 74.11%                | 46.46%                 |
| AdCC32T   | 120950308   | 3.96                 | 79.2                     | 95.27%               | 92.60%                | 88.50%                | 82.48%                | 75.10%                | 66.92%                | 29.23%                 |
| AdCC32N   | 100224178   | 3.19                 | 63.9                     | 95.13%               | 92.02%                | 86.36%                | 78.01%                | 68.00%                | 57.55%                | 16.86%                 |



**Supplementary Table S4: Non-silent and silent mutations identified in breast AdCC by whole exome massively parallel sequencing.**

| Non-silent mutations |            |                   |                       |            |           |                  |                  |                        |
|----------------------|------------|-------------------|-----------------------|------------|-----------|------------------|------------------|------------------------|
| Sample ID            | Gene       | Amino acid change | Effect                | Chromosome | Position  | Reference allele | Alternate allele | Mutant allele fraction |
| AdCC1T               | BMS1       | M93L              | NON_SYNONYMOUS_CODING | 10         | 43316112  | A                | T                | 44.70%                 |
| AdCC1T               | CASQ1      | E378G             | NON_SYNONYMOUS_CODING | 1          | 160171108 | A                | G                | 20.70%                 |
| AdCC1T               | CES1       | I49V              | NON_SYNONYMOUS_CODING | 16         | 55862791  | T                | C                | 20%                    |
| AdCC1T               | COA6       | R23G              | NON_SYNONYMOUS_CODING | 1          | 234509279 | A                | G                | 36.40%                 |
| AdCC1T               | COPA       | .                 | SPLICE_SITE_DONOR     | 1          | 160268634 | C                | T                | 37.70%                 |
| AdCC1T               | ENO3       | K427E             | NON_SYNONYMOUS_CODING | 17         | 4860316   | A                | G                | 10.40%                 |
| AdCC1T               | FUT2       | Y150*             | STOP_GAINED           | 19         | 49206663  | C                | A                | 20%                    |
| AdCC1T               | LRCH4      | G250R             | NON_SYNONYMOUS_CODING | 7          | 100176122 | C                | T                | 59.30%                 |
| AdCC1T               | LRRC36     | A583V             | NON_SYNONYMOUS_CODING | 16         | 67410717  | C                | T                | 6.20%                  |
| AdCC1T               | MAP4K4     | .                 | SPLICE_SITE_DONOR     | 2          | 102459144 | G                | T                | 14.70%                 |
| AdCC1T               | MUC2       | T1728S            | NON_SYNONYMOUS_CODING | 11         | 1093364   | C                | G                | 20%                    |
| AdCC1T               | MYB        | P566L             | NON_SYNONYMOUS_CODING | 6          | 135522886 | C                | T                | 44.40%                 |
| AdCC1T               | NFAT5      | S809_V811del      | CODON_DELETION        | 16         | 69726206  | ATCTTCAGTT       | A                | 44.07%                 |
| AdCC1T               | PGC        | V5G               | NON_SYNONYMOUS_CODING | 6          | 41715059  | A                | C                | 17.30%                 |
| AdCC1T               | PMCH       | A54V              | NON_SYNONYMOUS_CODING | 12         | 102591388 | G                | A                | 44.70%                 |
| AdCC1T               | PTPN7      | R234W             | NON_SYNONYMOUS_CODING | 1          | 202122870 | G                | A                | 22.60%                 |
| AdCC1T               | SHQ1       | Y284*             | STOP_GAINED           | 3          | 72866411  | A                | T                | 6.40%                  |
| AdCC1T               | SLC16A14   | N313D             | NON_SYNONYMOUS_CODING | 2          | 230910905 | T                | C                | 38.60%                 |
| AdCC1T               | SMYD2      | K231R             | NON_SYNONYMOUS_CODING | 1          | 214501054 | A                | G                | 39.50%                 |
| AdCC1T               | STAG3      | A646V             | NON_SYNONYMOUS_CODING | 7          | 99798468  | C                | T                | 29.20%                 |
| AdCC1T               | TNFAIP2    | V442G             | NON_SYNONYMOUS_CODING | 14         | 103598002 | T                | G                | 66.70%                 |
| AdCC1T               | ZNF132     | H22N              | NON_SYNONYMOUS_CODING | 19         | 58948582  | G                | T                | 6%                     |
| AdCC2T               | ATP1B2     | G162S             | NON_SYNONYMOUS_CODING | 17         | 7557507   | G                | A                | 46.10%                 |
| AdCC2T               | BX284668.1 | A21T              | NON_SYNONYMOUS_CODING | 1          | 17198583  | C                | T                | 9.70%                  |
| AdCC2T               | BX284668.1 | R6P               | NON_SYNONYMOUS_CODING | 1          | 17198627  | C                | G                | 10.60%                 |
| AdCC2T               | C10orf54   | R74H              | NON_SYNONYMOUS_CODING | 10         | 73521645  | C                | T                | 43.50%                 |
| AdCC2T               | CPS1       | D1396Y            | NON_SYNONYMOUS_CODING | 2          | 211540476 | G                | T                | 12.50%                 |
| AdCC2T               | DSCAM      | V589I             | NON_SYNONYMOUS_CODING | 21         | 41710046  | C                | T                | 56.20%                 |
| AdCC2T               | EPHB2      | S339T             | NON_SYNONYMOUS_CODING | 1          | 23191417  | T                | A                | 7.50%                  |
| AdCC2T               | FAM153B    | L222F             | NON_SYNONYMOUS_CODING | 5          | 175528584 | C                | T                | 4.50%                  |
| AdCC2T               | GPR116     | H603P             | NON_SYNONYMOUS_CODING | 6          | 46834688  | T                | G                | 46.60%                 |
| AdCC2T               | GPR142     | G290D             | NON_SYNONYMOUS_CODING | 17         | 72368219  | G                | A                | 25%                    |
| AdCC2T               | GRIN2A     | I836T             | NON_SYNONYMOUS_CODING | 16         | 9862796   | A                | G                | 24.50%                 |
| AdCC2T               | HSDL1      | M184L             | NON_SYNONYMOUS_CODING | 16         | 84163707  | T                | A                | 38.10%                 |
| AdCC2T               | ILDR2      | C222Y             | NON_SYNONYMOUS_CODING | 1          | 166905866 | C                | T                | 50%                    |
| AdCC2T               | MAP1B      | R64*              | STOP_GAINED           | 5          | 71411530  | C                | T                | 19%                    |
| AdCC2T               | AKAP2      | E608_E609insAE    | CODON_INSERTION       | 9          | 112900341 | G                | GGAGCT           | 33.33%                 |
| AdCC2T               | PRKD1      | G590C             | NON_SYNONYMOUS_CODING | 14         | 30095720  | C                | A                | 14.60%                 |
| AdCC2T               | PTPN11     | A72V              | NON_SYNONYMOUS_CODING | 12         | 112888199 | C                | T                | 45.20%                 |
| AdCC2T               | SKAP2      | D293A             | NON_SYNONYMOUS_CODING | 7          | 26724464  | T                | G                | 6.50%                  |
| AdCC2T               | SLAIN2     | V335fs            | FRAME_SHIFT           | 4          | 48384724  | AG               | A                | 10.98%                 |
| AdCC2T               | TLN2       | R93Q              | NON_SYNONYMOUS_CODING | 15         | 62944247  | G                | A                | 15%                    |
| AdCC2T               | USP9X      | M1526fs           | FRAME_SHIFT           | X          | 41057975  | A                | AT               | 22.22%                 |
| AdCC2T               | USP9X      | Y1477*            | STOP_GAINED           | X          | 41057831  | T                | G                | 5.60%                  |
| AdCC2T               | USP9X      | Y1757*            | STOP_GAINED           | X          | 41073902  | T                | G                | 9.30%                  |
| AdCC2T               | ZMYM3      | K493fs            | FRAME_SHIFT           | X          | 70469018  | TTC              | T                | 30.77%                 |
| AdCC3T               | GOLGA8R    | W116R             | NON_SYNONYMOUS_CODING | 15         | 30700159  | A                | G                | 20%                    |
| AdCC3T               | LRRC26     | T228K             | NON_SYNONYMOUS_CODING | 9          | 140063628 | G                | T                | 12.50%                 |
| AdCC3T               | MAGT1      | N132K             | NON_SYNONYMOUS_CODING | X          | 77112989  | G                | T                | 14.60%                 |
| AdCC3T               | MUC16      | N13579N           | NON_SYNONYMOUS_CODING | 19         | 8999445   | C                | T                | 8.50%                  |
| AdCC3T               | OR2T2      | R132A             | NON_SYNONYMOUS_CODING | 1          | 248616492 | C                | T                | 29.80%                 |
| AdCC3T               | SAA2       | V75A              | NON_SYNONYMOUS_CODING | 11         | 18267463  | A                | G                | 36.40%                 |
| AdCC3T               | TLN1       | L1481S            | NON_SYNONYMOUS_CODING | 9          | 35708366  | A                | G                | 40.90%                 |
| AdCC4T               | ANKRD29    | T105N             | NON_SYNONYMOUS_CODING | 18         | 21218829  | G                | T                | 8.30%                  |
| AdCC4T               | C12orf40   | P85S              | NON_SYNONYMOUS_CODING | 12         | 40040181  | C                | T                | 7.60%                  |
| AdCC4T               | C1QTNF9B   | C243S             | NON_SYNONYMOUS_CODING | 13         | 24465703  | A                | T                | 40%                    |

| Non-silent mutations |           |                   |                       |            |           |                  |                  |                        |
|----------------------|-----------|-------------------|-----------------------|------------|-----------|------------------|------------------|------------------------|
| Sample ID            | Gene      | Amino acid change | Effect                | Chromosome | Position  | Reference allele | Alternate allele | Mutant allele fraction |
| AdCC4T               | CDH3      | W591*             | STOP_GAINED           | 16         | 68721617  | G                | A                | 19.50%                 |
| AdCC4T               | CDK11A    | .                 | SPLICE_SITE_ACCEPTOR  | 1          | 1635380   | C                | G                | 6.40%                  |
| AdCC4T               | CPA2      | R394S             | NON_SYNONYMOUS_CODING | 7          | 129929507 | C                | A                | 6.90%                  |
| AdCC4T               | DISP2     | G3R               | NON_SYNONYMOUS_CODING | 15         | 40650529  | G                | C                | 25%                    |
| AdCC4T               | DOPEY1    | T1276fs           | FRAME_SHIFT           | 6          | 83847586  | A                | AT               | 17.14%                 |
| AdCC4T               | FGF20     | G50C              | NON_SYNONYMOUS_CODING | 8          | 16859394  | C                | A                | 33.30%                 |
| AdCC4T               | FGFR2     | P253R             | NON_SYNONYMOUS_CODING | 10         | 123279674 | G                | C                | 18.20%                 |
| AdCC4T               | IQSEC2    | A1259S            | NON_SYNONYMOUS_CODING | X          | 53264063  | C                | A                | 8.10%                  |
| AdCC4T               | LARP1     | R1079P            | NON_SYNONYMOUS_CODING | 5          | 154193601 | G                | C                | 6.80%                  |
| AdCC4T               | MAML3     | P723S             | NON_SYNONYMOUS_CODING | 4          | 140651722 | G                | A                | 12.70%                 |
| AdCC4T               | PCDHGB6   | H290Y             | NON_SYNONYMOUS_CODING | 5          | 140788637 | C                | T                | 7.20%                  |
| AdCC4T               | SLITRK2   | R646H             | NON_SYNONYMOUS_CODING | X          | 144905880 | G                | A                | 29.60%                 |
| AdCC4T               | SPTBN2    | A635S             | NON_SYNONYMOUS_CODING | 11         | 66472844  | C                | A                | 5.10%                  |
| AdCC4T               | STAG2     | D210fs            | FRAME_SHIFT           | X          | 123179178 | CTCACAAAG        | C                | 16.98%                 |
| AdCC4T               | TAF1D     | Q125*             | STOP_GAINED           | 11         | 93471361  | G                | A                | 44.70%                 |
| AdCC4T               | THSD4     | E723Q             | NON_SYNONYMOUS_CODING | 15         | 72039307  | G                | C                | 20.80%                 |
| AdCC4T               | TMPRSS11F | S80P              | NON_SYNONYMOUS_CODING | 4          | 68956285  | A                | G                | 10.50%                 |
| AdCC4T               | TRIM55    | I324T             | NON_SYNONYMOUS_CODING | 8          | 67062687  | T                | C                | 4.70%                  |
| AdCC4T               | TSC2      | L823M             | NON_SYNONYMOUS_CODING | 16         | 2124312   | C                | A                | 9.40%                  |
| AdCC4T               | ZNF667    | D496Y             | NON_SYNONYMOUS_CODING | 19         | 56952878  | C                | A                | 24.30%                 |
| AdCC5T               | CAPZB     | E218K             | NON_SYNONYMOUS_CODING | 1          | 19671683  | C                | T                | 19.20%                 |
| AdCC5T               | CAPZB     | V217I             | NON_SYNONYMOUS_CODING | 1          | 19671686  | C                | T                | 19.60%                 |
| AdCC5T               | INPP5D    | T848M             | NON_SYNONYMOUS_CODING | 2          | 234102590 | C                | T                | 39.30%                 |
| AdCC5T               | MEX3C     | A383P             | NON_SYNONYMOUS_CODING | 18         | 48703554  | C                | G                | 4.70%                  |
| AdCC5T               | MUC6      | P1465T            | NON_SYNONYMOUS_CODING | 11         | 1018408   | G                | T                | 11.40%                 |
| AdCC5T               | SEMA5B    | Q25*              | STOP_GAINED           | 3          | 122680038 | G                | A                | 44.20%                 |
| AdCC5T               | SLCO2A1   | C450S             | NON_SYNONYMOUS_CODING | 3          | 133664051 | C                | G                | 40.80%                 |
| AdCC5T               | SOS1      | M269K             | NON_SYNONYMOUS_CODING | 2          | 39278343  | A                | T                | 37.50%                 |
| AdCC5T               | SPOCD1    | S594*             | STOP_GAINED           | 1          | 32265412  | G                | T                | 57.10%                 |
| AdCC5T               | TMEM26    | G327C             | NON_SYNONYMOUS_CODING | 10         | 63170208  | C                | A                | 48.60%                 |
| AdCC5T               | WDR37     | L72P              | NON_SYNONYMOUS_CODING | 10         | 1123923   | T                | C                | 54.90%                 |
| AdCC6T               | ADAMTS14  | P545L             | NON_SYNONYMOUS_CODING | 10         | 72498632  | C                | T                | 27.80%                 |
| AdCC6T               | ARAF      | A379V             | NON_SYNONYMOUS_CODING | X          | 47428176  | C                | T                | 5.70%                  |
| AdCC6T               | CCDC22    | .                 | START_GAINED          | X          | 49092016  | C                | T                | 36.80%                 |
| AdCC6T               | CDH23     | E3157fs           | FRAME_SHIFT           | 10         | 73572317  | AG               | A                | 29.41%                 |
| AdCC6T               | CRY1      | I481S             | NON_SYNONYMOUS_CODING | 12         | 107391316 | A                | C                | 25.80%                 |
| AdCC6T               | GFM2      | I281T             | NON_SYNONYMOUS_CODING | 5          | 74041510  | A                | G                | 45.30%                 |
| AdCC6T               | GPRASP2   | S56F              | NON_SYNONYMOUS_CODING | X          | 101969964 | C                | T                | 28.60%                 |
| AdCC6T               | IGFN1     | G2007R            | NON_SYNONYMOUS_CODING | 1          | 201180040 | G                | A                | 5.80%                  |
| AdCC6T               | MAP1LC3B  | Y113C             | NON_SYNONYMOUS_CODING | 16         | 87436663  | A                | G                | 19.40%                 |
| AdCC6T               | MS4A3     | L141I             | NON_SYNONYMOUS_CODING | 11         | 59834493  | C                | A                | 36.80%                 |
| AdCC6T               | MUC4      | P1952S            | NON_SYNONYMOUS_CODING | 3          | 195512597 | G                | A                | 17.60%                 |
| AdCC6T               | PCMTD1    | P342S             | NON_SYNONYMOUS_CODING | 8          | 52732961  | G                | A                | 12%                    |
| AdCC6T               | RALY      | G231S             | NON_SYNONYMOUS_CODING | 20         | 32664866  | G                | A                | 31.30%                 |
| AdCC6T               | RNF4      | G138*             | STOP_GAINED           | 4          | 2514847   | G                | T                | 4.80%                  |
| AdCC6T               | SLC25A1   | .                 | SPLICE_SITE_DONOR     | 22         | 19163933  | C                | A                | 48.30%                 |
| AdCC6T               | TMEM155   | T110P             | NON_SYNONYMOUS_CODING | 4          | 122681514 | T                | G                | 34.50%                 |
| AdCC6T               | USP6      | R133K             | NON_SYNONYMOUS_CODING | 17         | 5037195   | G                | A                | 5.70%                  |
| AdCC6T               | VRK3      | N451H             | NON_SYNONYMOUS_CODING | 19         | 50482425  | T                | G                | 27%                    |
| AdCC6T               | ZNF479    | C67R              | NON_SYNONYMOUS_CODING | 7          | 57193788  | A                | G                | 28.60%                 |
| AdCC8T               | ALOX15    | G113S             | NON_SYNONYMOUS_CODING | 17         | 4542725   | C                | T                | 20%                    |
| AdCC8T               | CACNA1G   | T1404M            | NON_SYNONYMOUS_CODING | 17         | 48681557  | C                | T                | 35.90%                 |
| AdCC8T               | DND1      | P76L              | NON_SYNONYMOUS_CODING | 5          | 140052407 | G                | A                | 11.50%                 |
| AdCC8T               | KRTAP4-6  | S123P             | NON_SYNONYMOUS_CODING | 17         | 39296361  | A                | G                | 38.50%                 |
| AdCC8T               | KRTAP9-9  | S161Y             | NON_SYNONYMOUS_CODING | 17         | 39412119  | C                | A                | 14.30%                 |
| AdCC8T               | MRS2      | Q161H             | NON_SYNONYMOUS_CODING | 6          | 24411023  | G                | T                | 31.50%                 |
| AdCC8T               | MTTP      | Y314*             | STOP_GAINED           | 4          | 100518256 | C                | G                | 37.50%                 |
| AdCC8T               | PDE3A     | .                 | SPLICE_SITE_ACCEPTOR  | 12         | 20709592  | A                | G                | 26.90%                 |
| AdCC8T               | PGF       | V59G              | NON_SYNONYMOUS_CODING | 14         | 75416199  | A                | C                | 33.30%                 |

| Non-silent mutations |          |                   |                       |            |           |                  |                  |                        |
|----------------------|----------|-------------------|-----------------------|------------|-----------|------------------|------------------|------------------------|
| Sample ID            | Gene     | Amino acid change | Effect                | Chromosome | Position  | Reference allele | Alternate allele | Mutant allele fraction |
| AdCC8T               | RBMX     | G115R             | NON_SYNONYMOUS_CODING | X          | 135960119 | C                | T                | 30%                    |
| AdCC8T               | SLIT2    | R328*             | STOP_GAINED           | 4          | 20512185  | C                | T                | 5.60%                  |
| AdCC8T               | ZNF814   | D404E             | NON_SYNONYMOUS_CODING | 19         | 58385546  | G                | T                | 11.50%                 |
| AdCC9T               | ABCB7    | E730D             | NON_SYNONYMOUS_CODING | X          | 74273274  | C                | A                | 27.60%                 |
| AdCC9T               | ASB4     | C307Y             | NON_SYNONYMOUS_CODING | 7          | 95157557  | G                | A                | 44.20%                 |
| AdCC9T               | BRAF     | D594G             | NON_SYNONYMOUS_CODING | 7          | 140453154 | T                | C                | 46.80%                 |
| AdCC9T               | CRIPAK   | M215I             | NON_SYNONYMOUS_CODING | 4          | 1388944   | G                | A                | 30.80%                 |
| AdCC9T               | DLG4     | K679R             | NON_SYNONYMOUS_CODING | 17         | 7094618   | T                | C                | 61.50%                 |
| AdCC9T               | MLL2     | A2832fs           | FRAME_SHIFT           | 12         | 49432644  | G                | GCAAAAT          | .                      |
| AdCC9T               | MUC5B    | R2628S            | NON_SYNONYMOUS_CODING | 11         | 1265992   | C                | A                | 15.40%                 |
| AdCC9T               | NBPF10   | D1168E            | NON_SYNONYMOUS_CODING | 1          | 145323667 | C                | G                | 13.20%                 |
| AdCC9T               | SLC19A1  | L448*             | STOP_GAINED           | 21         | 46936005  | A                | T                | 23.30%                 |
| AdCC9T               | TFR2     | S383G             | NON_SYNONYMOUS_CODING | 7          | 100228635 | T                | C                | 16.70%                 |
| AdCC9T               | VCAN     | R155M             | NON_SYNONYMOUS_CODING | 5          | 82789383  | G                | T                | 52.60%                 |
| AdCC10T              | AP1B1    | .                 | SPLICE_SITE_DONOR     | 22         | 29758989  | C                | G                | 36.70%                 |
| AdCC10T              | HERC2    | R1211C            | NON_SYNONYMOUS_CODING | 15         | 28483865  | G                | A                | 6.70%                  |
| AdCC10T              | LRRRC37B | L570I             | NON_SYNONYMOUS_CODING | 17         | 30351758  | C                | A                | 8.60%                  |
| AdCC10T              | MTOR     | R1749G            | NON_SYNONYMOUS_CODING | 1          | 11194409  | G                | C                | 15.40%                 |
| AdCC10T              | MYO5A    | R1226H            | NON_SYNONYMOUS_CODING | 15         | 52643623  | C                | T                | 35.50%                 |
| AdCC10T              | NHSL2    | Y349*             | STOP_GAINED           | X          | 71359543  | C                | A                | 33.30%                 |
| AdCC10T              | OR5H14   | R143W             | NON_SYNONYMOUS_CODING | 3          | 97868656  | C                | T                | 9%                     |
| AdCC10T              | OR6Y1    | V129L             | NON_SYNONYMOUS_CODING | 1          | 158517511 | C                | A                | 13.60%                 |
| AdCC10T              | PANK3    | I301F             | NON_SYNONYMOUS_CODING | 5          | 167988433 | T                | A                | 12.50%                 |
| AdCC10T              | PARD3B   | R444*             | STOP_GAINED           | 2          | 205990357 | C                | T                | 26.90%                 |
| AdCC10T              | SF3B1    | R625H             | NON_SYNONYMOUS_CODING | 2          | 198267483 | C                | T                | 36.40%                 |
| AdCC10T              | ZBTB8A   | S326I             | NON_SYNONYMOUS_CODING | 1          | 33060808  | G                | T                | 12%                    |
| AdCC11T              | ARMCX4   | A1821V            | NON_SYNONYMOUS_CODING | X          | 100749038 | C                | T                | 100%                   |
| AdCC11T              | MUC12    | E4106K            | NON_SYNONYMOUS_CODING | 7          | 100645731 | G                | A                | 12.90%                 |
| AdCC11T              | SH3RF3   | V314M             | NON_SYNONYMOUS_CODING | 2          | 109988132 | G                | A                | 7.30%                  |
| AdCC11T              | SIMC1    | H325Y             | NON_SYNONYMOUS_CODING | 5          | 175717557 | C                | T                | 16.70%                 |
| AdCC11T              | WDR87    | Y378N             | NON_SYNONYMOUS_CODING | 19         | 38385094  | A                | T                | 15.70%                 |
| AdCC11T              | XPNPEP2  | E209D             | NON_SYNONYMOUS_CODING | X          | 128881719 | G                | T                | 21.20%                 |
| AdCC11T              | ZNF3     | N184S             | NON_SYNONYMOUS_CODING | 7          | 99669556  | T                | C                | 28%                    |
| AdCC12T              | ARAP1    | S207C             | NON_SYNONYMOUS_CODING | 11         | 72425256  | G                | C                | 50%                    |
| AdCC12T              | CHAC1    | T125M             | NON_SYNONYMOUS_CODING | 15         | 41246442  | C                | T                | 39.40%                 |
| AdCC12T              | CNN2     | Q5E               | NON_SYNONYMOUS_CODING | 19         | 1026673   | C                | G                | 47.60%                 |
| AdCC12T              | DLG3     | A49V              | NON_SYNONYMOUS_CODING | X          | 69665197  | C                | T                | 23.90%                 |
| AdCC12T              | FBXW7    | D642G             | NON_SYNONYMOUS_CODING | 4          | 153244232 | T                | C                | 52.90%                 |
| AdCC12T              | GRIN2B   | H1187Q            | NON_SYNONYMOUS_CODING | 12         | 13716611  | G                | C                | 45.50%                 |
| AdCC12T              | HMX2     | N269H             | NON_SYNONYMOUS_CODING | 10         | 124909622 | A                | C                | 37.60%                 |
| AdCC12T              | KIF13B   | F1752L            | NON_SYNONYMOUS_CODING | 8          | 28928248  | A                | G                | 45.50%                 |
| AdCC12T              | KRTAP4-7 | Y40C              | NON_SYNONYMOUS_CODING | 17         | 39240577  | A                | G                | 50%                    |
| AdCC12T              | MKI67    | S1447N            | NON_SYNONYMOUS_CODING | 10         | 129905764 | C                | T                | 50.70%                 |
| AdCC12T              | MUC4     | A2542T            | NON_SYNONYMOUS_CODING | 3          | 195510827 | C                | T                | 100%                   |
| AdCC12T              | NFKB2    | Y294C             | NON_SYNONYMOUS_CODING | 10         | 104158170 | A                | G                | 13.40%                 |
| AdCC12T              | OSBPL1A  | W251*             | STOP_GAINED           | 18         | 21897344  | C                | T                | 33.30%                 |
| AdCC12T              | PLXNB2   | G70V              | NON_SYNONYMOUS_CODING | 22         | 50728805  | C                | A                | 50%                    |
| AdCC12T              | QRICH2   | Q521*             | STOP_GAINED           | 17         | 74288749  | G                | A                | 43.50%                 |
| AdCC12T              | SETD1B   | .                 | SPLICE_SITE_DONOR     | 12         | 122265762 | T                | G                | 48.60%                 |
| AdCC12T              | SMARCA5  | R186*             | STOP_GAINED           | 4          | 144446639 | C                | T                | 44.40%                 |
| AdCC12T              | TLN2     | V16A              | NON_SYNONYMOUS_CODING | 15         | 62939556  | T                | C                | 42.70%                 |
| AdCC32T              | ATP10D   | R606Q             | NON_SYNONYMOUS_CODING | 4          | 47556924  | G                | A                | 9.30%                  |
| AdCC32T              | BRD1     | F987fs            | FRAME_SHIFT           | 22         | 50169273  | AC               | A                | 35.42%                 |
| AdCC32T              | CDH1     | T217fs            | FRAME_SHIFT           | 16         | 68842714  | CAG              | C                | 28.92%                 |
| AdCC32T              | CKAP2    | H141R             | NON_SYNONYMOUS_CODING | 13         | 53035380  | A                | G                | 44.60%                 |
| AdCC32T              | ERVV-1   | .                 | START_GAINED          | 19         | 53517185  | C                | T                | 31.30%                 |
| AdCC32T              | HCRTR2   | R248H             | NON_SYNONYMOUS_CODING | 6          | 55128601  | G                | A                | 40.90%                 |
| AdCC32T              | LHX5     | R184fs            | FRAME_SHIFT           | 12         | 113906056 | CG               | C                | 29%                    |

| Non-silent mutations |          |                   |                       |            |           |                  |                  |                        |
|----------------------|----------|-------------------|-----------------------|------------|-----------|------------------|------------------|------------------------|
| Sample ID            | Gene     | Amino acid change | Effect                | Chromosome | Position  | Reference allele | Alternate allele | Mutant allele fraction |
| AdCC32T              | MYB      | I181V             | NON_SYNONYMOUS_CODING | 6          | 135513475 | A                | G                | 42.90%                 |
| AdCC32T              | OR2B11   | L212S             | NON_SYNONYMOUS_CODING | 1          | 247614650 | A                | G                | 11.60%                 |
| AdCC32T              | OR8K1    | N235Y             | NON_SYNONYMOUS_CODING | 11         | 56114217  | A                | T                | 3.80%                  |
| AdCC32T              | RASA1    | L481P             | NON_SYNONYMOUS_CODING | 5          | 86658477  | T                | C                | 40.40%                 |
| AdCC32T              | TENM4    | T216M             | NON_SYNONYMOUS_CODING | 11         | 78614415  | G                | A                | 56.80%                 |
| AdCC32T              | VPS26A   | M261L             | NON_SYNONYMOUS_CODING | 10         | 70928298  | A                | T                | 24.40%                 |
| AdCC32T              | WDR81    | T675R             | NON_SYNONYMOUS_CODING | 17         | 1637508   | C                | G                | 31.90%                 |
| AdCC32T              | ZDHHC11B | C194S             | NON_SYNONYMOUS_CODING | 5          | 751328    | C                | G                | 43.30%                 |
| Silent mutations     |          |                   |                       |            |           |                  |                  |                        |
| Sample ID            | Gene     | Amino acid change | Effect                | Chromosome | Position  | Reference allele | Alternate allele | Mutant allele fraction |
| AdCC9T               | AARS     | Y547              | SYNONYMOUS_CODING     | 16         | 70296279  | G                | A                | 16.50%                 |
| AdCC9T               | HPR      | L146              | SYNONYMOUS_CODING     | 16         | 72110371  | C                | T                | 12.30%                 |
| AdCC9T               | SREBF1   | R625              | SYNONYMOUS_CODING     | 17         | 17720272  | C                | T                | 41.80%                 |
| AdCC9T               | LAMA5    | A863              | SYNONYMOUS_CODING     | 20         | 60909392  | C                | A                | 9.40%                  |
| AdCC9T               | PIP      | D93               | SYNONYMOUS_CODING     | 7          | 142836245 | C                | T                | 34.80%                 |
| AdCC9T               | PNPLA7   | F1059             | SYNONYMOUS_CODING     | 9          | 140358627 | G                | A                | 38.50%                 |
| AdCC9T               | SLC25A5  | R106              | SYNONYMOUS_CODING     | X          | 118603830 | A                | G                | 13.50%                 |
| AdCC9T               | SPANXN5  | P30               | SYNONYMOUS_CODING     | X          | 52825657  | T                | C                | 45.50%                 |
| AdCC8T               | KRTAP5-7 | C24               | SYNONYMOUS_CODING     | 11         | 71238418  | T                | C                | 12.00%                 |
| AdCC8T               | KRTAP9-9 | T152              | SYNONYMOUS_CODING     | 17         | 39412093  | C                | A                | 13.00%                 |
| AdCC8T               | SEMA6B   | F352              | SYNONYMOUS_CODING     | 19         | 4550876   | G                | A                | 30.40%                 |
| AdCC8T               | ATRAID   | T167              | SYNONYMOUS_CODING     | 2          | 27438384  | C                | T                | 4.40%                  |
| AdCC8T               | KMT2C    | P335              | SYNONYMOUS_CODING     | 7          | 151970797 | A                | T                | 20.00%                 |
| AdCC8T               | NOTCH1   | F1259             | SYNONYMOUS_CODING     | 9          | 139401292 | G                | A                | 15.70%                 |
| AdCC6T               | C1orf68  | Y109              | SYNONYMOUS_CODING     | 1          | 152692324 | C                | T                | 30.00%                 |
| AdCC6T               | ITIH2    | A547              | SYNONYMOUS_CODING     | 10         | 7773953   | G                | A                | 30.40%                 |
| AdCC6T               | MRGPRD   | L256              | SYNONYMOUS_CODING     | 11         | 68747688  | C                | T                | 43.30%                 |
| AdCC6T               | ATP2A2   | V347              | SYNONYMOUS_CODING     | 12         | 110765768 | T                | C                | 21.20%                 |
| AdCC6T               | ATP2C2   | T567              | SYNONYMOUS_CODING     | 16         | 84485567  | G                | A                | 37.50%                 |
| AdCC6T               | PRDM1    | P467              | SYNONYMOUS_CODING     | 6          | 106553436 | G                | A                | 15.80%                 |
| AdCC5T               | PCGF5    | G219              | SYNONYMOUS_CODING     | 10         | 93024271  | C                | T                | 36.20%                 |
| AdCC5T               | LDLRAD3  | P321              | SYNONYMOUS_CODING     | 11         | 36250872  | G                | A                | 49.50%                 |
| AdCC5T               | ASXL3    | K770              | SYNONYMOUS_CODING     | 18         | 31319678  | G                | A                | 47.20%                 |
| AdCC5T               | ARF4     | N95               | SYNONYMOUS_CODING     | 3          | 57563088  | G                | A                | 44.00%                 |
| AdCC4T               | PLA2G5   | T60               | SYNONYMOUS_CODING     | 1          | 20412715  | C                | T                | 34.90%                 |
| AdCC4T               | RNF17    | S270              | SYNONYMOUS_CODING     | 13         | 25363512  | A                | C                | 19.40%                 |
| AdCC4T               | COG6     | A630              | SYNONYMOUS_CODING     | 13         | 40325146  | C                | T                | 25.20%                 |
| AdCC4T               | DDX52    | T216              | SYNONYMOUS_CODING     | 17         | 35990159  | T                | G                | 39.70%                 |
| AdCC4T               | USP34    | G1551             | SYNONYMOUS_CODING     | 2          | 61515908  | A                | G                | 19.80%                 |
| AdCC4T               | ISM1     | T334              | SYNONYMOUS_CODING     | 20         | 13279713  | G                | A                | 4.90%                  |
| AdCC4T               | FGL2     | G260              | SYNONYMOUS_CODING     | 7          | 76826136  | C                | G                | 22.00%                 |
| AdCC4T               | PABPC5   | T78               | SYNONYMOUS_CODING     | X          | 90690810  | C                | T                | 8.80%                  |
| AdCC3T               | CDC27    | S102              | SYNONYMOUS_CODING     | 17         | 45247354  | G                | A                | 16.70%                 |
| AdCC3T               | HLA-B    | R258              | SYNONYMOUS_CODING     | 6          | 31323215  | T                | C                | 18.50%                 |
| AdCC32T              | MST1L    | I342              | SYNONYMOUS_CODING     | 1          | 17085795  | G                | T                | 10.70%                 |
| AdCC32T              | AMPD3    | K44               | SYNONYMOUS_CODING     | 11         | 10483171  | A                | G                | 39.60%                 |
| AdCC32T              | SLC25A47 | T43               | SYNONYMOUS_CODING     | 14         | 100792550 | G                | T                | 49.30%                 |
| AdCC32T              | ADPRH    | D47               | SYNONYMOUS_CODING     | 3          | 119301157 | C                | T                | 36.20%                 |
| AdCC32T              | GALNT15  | A71               | SYNONYMOUS_CODING     | 3          | 16216871  | T                | A                | 31.50%                 |
| AdCC2T               | OR8H1    | G203              | SYNONYMOUS_CODING     | 11         | 56057930  | A                | G                | 10.30%                 |
| AdCC2T               | SLC4A8   | A683              | SYNONYMOUS_CODING     | 12         | 51868867  | G                | A                | 82.80%                 |
| AdCC2T               | PDE4C    | T626              | SYNONYMOUS_CODING     | 19         | 18322000  | C                | T                | 43.50%                 |
| AdCC2T               | SCN2A    | A215              | SYNONYMOUS_CODING     | 2          | 166165901 | G                | C                | 12.50%                 |
| AdCC2T               | OSBPL10  | T640              | SYNONYMOUS_CODING     | 3          | 31710310  | G                | A                | 49.40%                 |
| AdCC2T               | PSD2     | S290              | SYNONYMOUS_CODING     | 5          | 139193803 | C                | T                | 22.40%                 |
| AdCC2T               | GPR98    | A4741             | SYNONYMOUS_CODING     | 5          | 90086869  | C                | T                | 9.20%                  |
| AdCC2T               | HSP90AB1 | T537              | SYNONYMOUS_CODING     | 6          | 44219884  | C                | A                | 43.30%                 |

| Silent mutations |           |                   |                   |            |           |                  |                  |                        |
|------------------|-----------|-------------------|-------------------|------------|-----------|------------------|------------------|------------------------|
| Sample ID        | Gene      | Amino acid change | Effect            | Chromosome | Position  | Reference allele | Alternate allele | Mutant allele fraction |
| AdCC2T           | PRSS35    | T298              | SYNONYMOUS_CODING | 6          | 84234054  | G                | A                | 7.30%                  |
| AdCC1T           | KANK4     | G212              | SYNONYMOUS_CODING | 1          | 62740140  | A                | C                | 20.00%                 |
| AdCC1T           | ALKBH2    | R193              | SYNONYMOUS_CODING | 12         | 109526218 | T                | C                | 40.00%                 |
| AdCC1T           | NEO1      | K1143             | SYNONYMOUS_CODING | 15         | 73580672  | A                | G                | 42.60%                 |
| AdCC1T           | PLEKHM1   | K978              | SYNONYMOUS_CODING | 17         | 43516968  | C                | T                | 33.30%                 |
| AdCC1T           | SHANK1    | G2111             | SYNONYMOUS_CODING | 19         | 51165375  | A                | C                | 15.00%                 |
| AdCC1T           | TSPEAR    | S423              | SYNONYMOUS_CODING | 21         | 45945603  | G                | A                | 47.50%                 |
| AdCC1T           | TPRN      | T693              | SYNONYMOUS_CODING | 9          | 140086621 | T                | G                | 26.70%                 |
| AdCC12T          | OR4K17    | L34               | SYNONYMOUS_CODING | 14         | 20585665  | C                | T                | 48.90%                 |
| AdCC12T          | ADAMTS18  | T867              | SYNONYMOUS_CODING | 16         | 77334233  | A                | G                | 20.80%                 |
| AdCC12T          | SPOPL     | R99               | SYNONYMOUS_CODING | 2          | 139308567 | C                | A                | 8.10%                  |
| AdCC12T          | ATP6V1B1  | A512              | SYNONYMOUS_CODING | 2          | 71192245  | G                | A                | 11.60%                 |
| AdCC12T          | OGFRL1    | S352              | SYNONYMOUS_CODING | 6          | 72011452  | C                | T                | 40.20%                 |
| AdCC12T          | SUPT20HL2 | T813              | SYNONYMOUS_CODING | X          | 24328994  | G                | A                | 54.40%                 |
| AdCC12T          | WNK3      | E992              | SYNONYMOUS_CODING | X          | 54275805  | C                | T                | 40.10%                 |
| AdCC11T          | IL18      | N191              | SYNONYMOUS_CODING | 11         | 112014328 | G                | A                | 18.30%                 |
| AdCC11T          | MAPK7     | D695              | SYNONYMOUS_CODING | 17         | 19285701  | C                | T                | 31.00%                 |
| AdCC11T          | CYP4F12   | P13               | SYNONYMOUS_CODING | 19         | 15784378  | G                | T                | 20.00%                 |
| AdCC11T          | PNLDC1    | L126              | SYNONYMOUS_CODING | 6          | 160225586 | C                | T                | 17.90%                 |
| AdCC11T          | C6orf163  | I180              | SYNONYMOUS_CODING | 6          | 88066207  | C                | T                | 11.50%                 |
| AdCC11T          | FAM3C     | C64               | SYNONYMOUS_CODING | 7          | 121011434 | G                | A                | 7.50%                  |
| AdCC11T          | GPR101    | C182              | SYNONYMOUS_CODING | X          | 136113288 | G                | A                | 9.90%                  |
| AdCC10T          | SUCO      | H876              | SYNONYMOUS_CODING | 1          | 172558416 | T                | C                | 31.70%                 |
| AdCC10T          | DDX11     | A380              | SYNONYMOUS_CODING | 12         | 31244703  | C                | T                | 26.30%                 |
| AdCC10T          | TUBA3D    | L259              | SYNONYMOUS_CODING | 2          | 132238043 | A                | C                | 7.30%                  |
| AdCC10T          | HCLS1     | P368              | SYNONYMOUS_CODING | 3          | 121351315 | G                | A                | 40.90%                 |

**Supplementary Table S5: Targeted amplicon resequencing validation of somatic mutations identified by massively parallel sequencing in breast AdCCs, clonal frequencies, and mutation function prediction.**

| Sample ID | Chromosome | Genomic position | Gene           | Amino acid change | Effect                | Reference allele | Alternate allele | Validation | Sequence depth (x) | Mutant allele fraction | CHASM Breast | Mutation Taster | 5000S - Lawrence et al. (Nature, 2014) | 127 genes; Kandoth et al. (Nature, 2013) | Cancer Gene Census | Consensus impact | Cancer cell fraction (ABSO-LUTE) | Mutated in salivary gland AdCCs; Ho et al (Nat Genet 2013) | Mutated in salivary gland AdCCs; Stephens et al (JCI 2013) |
|-----------|------------|------------------|----------------|-------------------|-----------------------|------------------|------------------|------------|--------------------|------------------------|--------------|-----------------|----------------------------------------|------------------------------------------|--------------------|------------------|----------------------------------|------------------------------------------------------------|------------------------------------------------------------|
| AdCC1T    | 10         | 43316112         | BMS1           | M976L             | NON_SYNONYMOUS_CODING | A                | T                | validated  | 7763               | 44.45%                 | passenger    | D               | no                                     | no                                       | no                 | non-passenger    | 100.00%                          |                                                            |                                                            |
| AdCC1T    | 1          | 160171108        | CASQ1          | E378G             | NON_SYNONYMOUS_CODING | A                | G                | validated  | 6454               | 0.48%                  | passenger    | D               | no                                     | no                                       | no                 | non-passenger    | 49.00%                           |                                                            |                                                            |
| AdCC1T    | 16         | 55862791         | CES1           | I49V              | NON_SYNONYMOUS_CODING | T                | C                | validated  | 7058               | 26.48%                 | passenger    | N               | no                                     | no                                       | no                 | passenger        | 47.00%                           |                                                            |                                                            |
| AdCC1T    | 1          | 234509279        | COA6           | R23G              | NON_SYNONYMOUS_CODING | A                | G                | validated  | 6805               | 0.22%                  | passenger    | N               | no                                     | no                                       | no                 | passenger        | 86.00%                           |                                                            |                                                            |
| AdCC1T    | 1          | 160268634        | COPA           | .                 | SPLICE_SITE_DONOR     | C                | T                | validated  | 7720               | 47.02%                 |              | D               | no                                     | no                                       | no                 | non-passenger    | 89.00%                           |                                                            |                                                            |
| AdCC1T    | 17         | 4860316          | ENO3           | K427E             | NON_SYNONYMOUS_CODING | A                | G                | validated  | 7389               | 2.69%                  | passenger    | D               | no                                     | no                                       | no                 | non-passenger    | 25.00%                           |                                                            |                                                            |
| AdCC1T    | 19         | 49206663         | FUT2           | Y150*             | STOP_GAINED           | C                | A                | validated  | 7236               | 0.11%                  |              | A               | no                                     | no                                       | no                 | non-passenger    | 47.00%                           |                                                            |                                                            |
| AdCC1T    | 7          | 100176122        | LRCH4          | G250R             | NON_SYNONYMOUS_CODING | C                | T                | validated  | 7579               | 48.19%                 | passenger    | D               | no                                     | no                                       | no                 | non-passenger    | 100.00%                          |                                                            |                                                            |
| AdCC1T    | 16         | 67410717         | LRRC36         | A583V             | NON_SYNONYMOUS_CODING | C                | T                | validated  | 7454               | 4.67%                  | passenger    | D               | no                                     | no                                       | no                 | non-passenger    | 15.00%                           |                                                            |                                                            |
| AdCC1T    | 11         | 1093364          | MUC2           | T1728S            | NON_SYNONYMOUS_CODING | C                | G                | not tested | not tested         | not tested             | passenger    | N               | no                                     | no                                       | no                 | passenger        | 47.00%                           |                                                            |                                                            |
| AdCC1T    | 6          | 135522886        | MYB            | P687L             | NON_SYNONYMOUS_CODING | C                | T                | validated  | 7568               | 44.12%                 | passenger    | D               | no                                     | no                                       | yes                | non-passenger    | 100.00%                          | yes                                                        |                                                            |
| AdCC1T    | 16         | 69726206         | NFAT5          | S809_V81<br>1del  | CODON_DELETION        | ATCTTCA<br>GTT   | A                | validated  | 7144               | 0.21%                  |              | P               | no                                     | no                                       | no                 | passenger        | 100.00%                          |                                                            |                                                            |
| AdCC1T    | 12         | 102591388        | PMCH           | A54V              | NON_SYNONYMOUS_CODING | G                | A                | validated  | 7757               | 44.59%                 | passenger    | N               | no                                     | no                                       | no                 | passenger        | 100.00%                          |                                                            |                                                            |
| AdCC1T    | 1          | 202122870        | PTPN7          | R339W             | NON_SYNONYMOUS_CODING | G                | A                | validated  | 5942               | 50.89%                 | passenger    | D               | no                                     | no                                       | no                 | non-passenger    | 53.00%                           |                                                            |                                                            |
| AdCC1T    | 3          | 72866411         | SHQ1           | Y284*             | STOP_GAINED           | A                | T                | validated  | 7880               | 0.18%                  |              | A               | no                                     | no                                       | no                 | non-passenger    | 15.00%                           |                                                            |                                                            |
| AdCC1T    | 2          | 230910905        | SLC16A14       | N313D             | NON_SYNONYMOUS_CODING | T                | C                | validated  | 7524               | 42.46%                 | passenger    | D               | no                                     | no                                       | no                 | non-passenger    | 91.00%                           |                                                            |                                                            |
| AdCC1T    | 1          | 214501054        | SMYD2          | K231R             | NON_SYNONYMOUS_CODING | A                | G                | validated  | 7334               | 46.20%                 | passenger    | N               | no                                     | no                                       | no                 | passenger        | 93.00%                           |                                                            |                                                            |
| AdCC1T    | 7          | 99798468         | STAG3          | A646V             | NON_SYNONYMOUS_CODING | C                | T                | validated  | 6797               | 38.59%                 | passenger    | D               | no                                     | no                                       | no                 | non-passenger    | 69.00%                           |                                                            |                                                            |
| AdCC1T    | 14         | 103598002        | TNFAIP2        | V442G             | NON_SYNONYMOUS_CODING | T                | G                | validated  | 7683               | 0.20%                  | passenger    | N               | no                                     | no                                       | no                 | passenger        | 100.00%                          |                                                            |                                                            |
| AdCC2T    | 17         | 7557507          | ATP1B2         | G162S             | NON_SYNONYMOUS_CODING | G                | A                | validated  | 7397               | 48.32%                 | passenger    | D               | no                                     | no                                       | no                 | non-passenger    | 100.00%                          |                                                            |                                                            |
| AdCC2T    | 1          | 17198583         | BX284668.<br>1 | A21T              | NON_SYNONYMOUS_CODING | C                | T                | not tested | not tested         | not tested             | passenger    |                 | no                                     | no                                       | no                 | passenger        | 21.00%                           |                                                            |                                                            |
| AdCC2T    | 1          | 17198627         | BX284668.<br>1 | R6P               | NON_SYNONYMOUS_CODING | C                | G                | not tested | not tested         | not tested             | passenger    |                 | no                                     | no                                       | no                 | passenger        | 23.00%                           |                                                            |                                                            |
| AdCC2T    | 10         | 73521645         | C10orf54       | R74H              | NON_SYNONYMOUS_CODING | C                | T                | validated  | 7416               | 48.75%                 | passenger    | N               | no                                     | no                                       | no                 | passenger        | 95.00%                           |                                                            |                                                            |
| AdCC2T    | 2          | 211540476        | CPS1           | D1402Y            | NON_SYNONYMOUS_CODING | G                | T                | validated  | 7855               | 13.43%                 | passenger    | D               | no                                     | no                                       | no                 | non-passenger    | 27.00%                           |                                                            |                                                            |
| AdCC2T    | 21         | 41710046         | DSCAM          | V589I             | NON_SYNONYMOUS_CODING | C                | T                | not tested | not tested         | not tested             | passenger    | D               | no                                     | no                                       | no                 | non-passenger    | 100.00%                          |                                                            |                                                            |
| AdCC2T    | 1          | 23191417         | EPHB2          | S339T             | NON_SYNONYMOUS_CODING | T                | A                | not tested | not tested         | not tested             | passenger    | D               | no                                     | no                                       | no                 | non-passenger    | 16.00%                           |                                                            |                                                            |
| AdCC2T    | 5          | 175528584        | FAM153B        | L222F             | NON_SYNONYMOUS_CODING | C                | T                | not tested | not tested         | not tested             | passenger    | N               | no                                     | no                                       | no                 | passenger        | 10.00%                           |                                                            |                                                            |
| AdCC2T    | 6          | 46834688         | GPR116         | H603P             | NON_SYNONYMOUS_CODING | T                | G                | validated  | 7880               | 45.33%                 | passenger    | N               | no                                     | no                                       | no                 | passenger        | 100.00%                          |                                                            |                                                            |
| AdCC2T    | 16         | 9862796          | GRIN2A         | I836T             | NON_SYNONYMOUS_CODING | A                | G                | validated  | 7379               | 15.88%                 | passenger    | D               | no                                     | no                                       | no                 | non-passenger    | 53.00%                           |                                                            |                                                            |
| AdCC2T    | 16         | 84163707         | HSDL1          | M184L             | NON_SYNONYMOUS_CODING | T                | A                | validated  | 7630               | 47.44%                 | passenger    | D               | no                                     | no                                       | no                 | non-passenger    | 83.00%                           |                                                            |                                                            |
| AdCC2T    | 1          | 166905866        | ILDR2          | C222Y             | NON_SYNONYMOUS_CODING | C                | T                | validated  | 7343               | 52.19%                 | passenger    | D               | no                                     | no                                       | no                 | non-passenger    | 100.00%                          |                                                            |                                                            |
| AdCC2T    | 5          | 71411530         | MAP1B          | R64*              | STOP_GAINED           | C                | T                | validated  | 7517               | 17.93%                 |              | A               | no                                     | no                                       | no                 | non-passenger    | 41.00%                           |                                                            |                                                            |

| Sample ID | Chromosome | Genomic position | Gene     | Amino acid change | Effect                | Reference allele | Alternate allele | Validation | Sequence depth (x) | MAF        | CHASM Breast | Mutation Taster | 5000S - Lawrence et al. (Nature, 2014) | 127 genes; Kandoth et al. (Nature, 2013) | Cancer Gene Census | Consensus impact | Cancer cell fraction (ABSO-LUTE) | Mutated in salivary gland AdCCs; Ho et al (Nat Genet 2013) | Mutated in salivary gland AdCCs; Stephens et al (JCI 2013) |
|-----------|------------|------------------|----------|-------------------|-----------------------|------------------|------------------|------------|--------------------|------------|--------------|-----------------|----------------------------------------|------------------------------------------|--------------------|------------------|----------------------------------|------------------------------------------------------------|------------------------------------------------------------|
| AdCC2T    | 9          | 112900341        | AKAP2    | E608_E609insAE    | CODON_INSERTION       | G                | GGAAGCT          | validated  | 7471               | 40.14%     | .            | P               | no                                     | no                                       | no                 | passenger        | 73.00%                           |                                                            |                                                            |
| AdCC2T    | 14         | 30095720         | PRKD1    | G598C             | NON_SYNONYMOUS_CODING | C                | A                | validated  | 7511               | 17.89%     | driver       | D               | no                                     | no                                       | no                 | non-passenger    | 32.00%                           | yes                                                        |                                                            |
| AdCC2T    | 12         | 112888199        | PTPN11   | A72V              | NON_SYNONYMOUS_CODING | C                | T                | validated  | 7399               | 46.40%     | passenger    | D               | yes                                    | yes                                      | yes                | non-passenger    | 98.00%                           |                                                            |                                                            |
| AdCC2T    | 7          | 26724464         | SKAP2    | D293A             | NON_SYNONYMOUS_CODING | T                | G                | validated  | 7940               | 0.20%      | passenger    | D               | no                                     | no                                       | no                 | non-passenger    | 14.00%                           |                                                            |                                                            |
| AdCC2T    | 4          | 48384724         | SLAIN2   | V335fs            | FRAME_SHIFT           | AG               | A                | validated  | 7800               | 12.78%     | .            | A               | no                                     | no                                       | no                 | non-passenger    | 24.00%                           |                                                            |                                                            |
| AdCC2T    | 15         | 62944247         | TLN2     | R93Q              | NON_SYNONYMOUS_CODING | G                | A                | validated  | 7877               | 12.09%     | passenger    | D               | no                                     | no                                       | no                 | non-passenger    | 33.00%                           |                                                            |                                                            |
| AdCC2T    | X          | 41057975         | USP9X    | M1526fs           | FRAME_SHIFT           | A                | AT               | validated  | 6326               | 2.97%      | .            | A               | no                                     | yes                                      | no                 | non-passenger    | 48.00%                           |                                                            |                                                            |
| AdCC2T    | X          | 41057831         | USP9X    | Y1477*            | STOP_GAINED           | T                | G                | validated  | 7834               | 2.73%      | .            | A               | no                                     | yes                                      | no                 | non-passenger    | 20.00%                           |                                                            |                                                            |
| AdCC2T    | X          | 41073902         | USP9X    | Y1757*            | STOP_GAINED           | T                | G                | validated  | 7800               | 4.71%      | .            | A               | no                                     | yes                                      | no                 | non-passenger    | 12.00%                           |                                                            |                                                            |
| AdCC2T    | X          | 70469018         | ZMYM3    | K493fs            | FRAME_SHIFT           | TTC              | T                | validated  | 787                | 32.53%     | .            | A               | no                                     | no                                       | no                 | non-passenger    | 67.00%                           |                                                            |                                                            |
| AdCC3T    | 15         | 30700159         | GOLGA8R  | W275R             | NON_SYNONYMOUS_CODING | A                | G                | validated  | 7284               | 2.88%      | passenger    |                 | no                                     | no                                       | no                 | passenger        | 43.00%                           |                                                            |                                                            |
| AdCC3T    | 9          | 140063628        | LRRRC26  | T228K             | NON_SYNONYMOUS_CODING | G                | T                | not tested | not tested         | not tested | passenger    | N               | no                                     | no                                       | no                 | passenger        | 40.00%                           |                                                            |                                                            |
| AdCC3T    | 19         | 8999445          | MUC16    | S13577N           | NON_SYNONYMOUS_CODING | C                | T                | validated  | 7175               | 0.14%      | passenger    |                 | no                                     | no                                       | no                 | passenger        | 27.00%                           | yes                                                        |                                                            |
| AdCC3T    | 1          | 248616492        | OR2T2    | R132W             | NON_SYNONYMOUS_CODING | C                | T                | validated  | 7760               | 24.92%     | passenger    | N               | no                                     | no                                       | no                 | passenger        | 94.00%                           |                                                            |                                                            |
| AdCC3T    | 11         | 18267463         | SAA2     | V75A              | NON_SYNONYMOUS_CODING | A                | G                | not tested | not tested         | not tested | passenger    | N               | no                                     | no                                       | no                 | passenger        | 100.00%                          |                                                            |                                                            |
| AdCC3T    | 9          | 35708366         | TLN1     | L1481S            | NON_SYNONYMOUS_CODING | A                | G                | validated  | 7318               | 48.51%     | passenger    | D               | no                                     | no                                       | no                 | non-passenger    | 100.00%                          | yes                                                        |                                                            |
| AdCC4T    | 18         | 21218829         | ANKRD29  | T105N             | NON_SYNONYMOUS_CODING | G                | T                | validated  | 7468               | 1.57%      | passenger    | D               | no                                     | no                                       | no                 | non-passenger    | 38.00%                           |                                                            |                                                            |
| AdCC4T    | 12         | 40040181         | C12orf40 | P85S              | NON_SYNONYMOUS_CODING | C                | T                | not tested | not tested         | not tested | passenger    | N               | no                                     | no                                       | no                 | passenger        | 50.00%                           |                                                            |                                                            |
| AdCC4T    | 13         | 24465703         | C1QTNF9B | C243S             | NON_SYNONYMOUS_CODING | A                | T                | validated  | 7266               | 4.38%      | passenger    | D               | no                                     | no                                       | no                 | non-passenger    | 100.00%                          |                                                            |                                                            |
| AdCC4T    | 16         | 68721617         | CDH3     | W591*             | STOP_GAINED           | G                | A                | validated  | 7674               | 30.11%     | .            | A               | no                                     | no                                       | no                 | non-passenger    | 88.00%                           |                                                            |                                                            |
| AdCC4T    | 1          | 1635380          | CDK11A   | .                 | SPLICE_SITE_ACCEPTOR  | C                | G                | validated  | 6866               | 3.42%      | .            | D               | no                                     | no                                       | no                 | non-passenger    | 29.00%                           |                                                            |                                                            |
| AdCC4T    | 7          | 129929507        | CPA2     | R394S             | NON_SYNONYMOUS_CODING | C                | A                | validated  | 7416               | 5.47%      | passenger    | N               | no                                     | no                                       | no                 | passenger        | 31.00%                           |                                                            |                                                            |
| AdCC4T    | 15         | 40650529         | DISP2    | G3R               | NON_SYNONYMOUS_CODING | G                | C                | not tested | not tested         | not tested | passenger    | N               | no                                     | no                                       | no                 | passenger        | 100.00%                          |                                                            |                                                            |
| AdCC4T    | 6          | 83847586         | DOPEY1   | L1276fs           | FRAME_SHIFT           | A                | AT               | validated  | 7412               | 16.62%     | .            | A               | no                                     | no                                       | no                 | non-passenger    | 95.00%                           |                                                            |                                                            |
| AdCC4T    | 8          | 16859394         | FGF20    | G50C              | NON_SYNONYMOUS_CODING | C                | A                | validated  | 6682               | 0.16%      | passenger    | N               | no                                     | no                                       | no                 | passenger        | 100.00%                          |                                                            |                                                            |
| AdCC4T    | 10         | 123279674        | FGFR2    | P253R             | NON_SYNONYMOUS_CODING | G                | C                | validated  | 7556               | 18.90%     | passenger    | A               | yes                                    | yes                                      | yes                | non-passenger    | 82.00%                           |                                                            | yes                                                        |
| AdCC4T    | X          | 53264063         | IQSEC2   | A1269S            | NON_SYNONYMOUS_CODING | C                | A                | validated  | 5752               | 0.12%      | passenger    | D               | no                                     | no                                       | no                 | non-passenger    | 37.00%                           |                                                            |                                                            |
| AdCC4T    | 5          | 154193601        | LARP1    | R1002P            | NON_SYNONYMOUS_CODING | G                | C                | validated  | 4100               | 9.51%      | passenger    | D               | no                                     | no                                       | no                 | non-passenger    | 31.00%                           |                                                            |                                                            |
| AdCC4T    | 4          | 140651722        | MAML3    | P727S             | NON_SYNONYMOUS_CODING | G                | A                | validated  | 7520               | 22.62%     | passenger    | D               | no                                     | no                                       | no                 | non-passenger    | 58.00%                           | yes                                                        |                                                            |
| AdCC4T    | 5          | 140788637        | PCDHGB6  | H290Y             | NON_SYNONYMOUS_CODING | C                | T                | validated  | 7414               | 5.95%      | passenger    | N               | no                                     | no                                       | no                 | passenger        | 33.00%                           |                                                            |                                                            |
| AdCC4T    | X          | 144905880        | SLITRK2  | R646H             | NON_SYNONYMOUS_CODING | G                | A                | validated  | 7872               | 22.29%     | passenger    | D               | no                                     | no                                       | no                 | non-passenger    | 100.00%                          |                                                            |                                                            |
| AdCC4T    | 11         | 66472844         | SPTBN2   | A635S             | NON_SYNONYMOUS_CODING | C                | A                | not tested | not tested         | not tested | passenger    | N               | no                                     | no                                       | no                 | passenger        | 23.00%                           |                                                            |                                                            |
| AdCC4T    | X          | 123179178        | STAG2    | D210fs            | FRAME_SHIFT           | CTCACAA<br>G     | C                | validated  | 7194               | 0.53%      | .            | A               | yes                                    | yes                                      | yes                | non-passenger    | 77.00%                           |                                                            |                                                            |
| AdCC4T    | 11         | 93471361         | TAF1D    | Q125*             | STOP_GAINED           | G                | A                | validated  | 7762               | 27.72%     | .            | A               | no                                     | no                                       | no                 | non-passenger    | 100.00%                          |                                                            |                                                            |

| Sample ID | Chromosome | Genomic position | Gene      | Amino acid change | Effect                | Reference allele | Alternate allele | Validation | Sequence depth (x) | MAF        | CHASM Breast | Mutation Taster | 5000S - Lawrence et al. (Nature, 2014) | 127 genes; Kandath et al. (Nature, 2013) | Cancer Gene Census | Consensus impact | Cancer cell fraction (ABSOLUTE) | Mutated in salivary gland AdCCs; Ho et al (Nat Genet 2013) | Mutated in salivary gland AdCCs; Stephens et al (JCI 2013) |
|-----------|------------|------------------|-----------|-------------------|-----------------------|------------------|------------------|------------|--------------------|------------|--------------|-----------------|----------------------------------------|------------------------------------------|--------------------|------------------|---------------------------------|------------------------------------------------------------|------------------------------------------------------------|
| AdCC4T    | 15         | 72039307         | THSD4     | E723Q             | NON_SYNONYMOUS_CODING | G                | C                | validated  | 7745               | 20.83%     | passenger    | D               | no                                     | no                                       | no                 | non-passenger    | 94.00%                          |                                                            |                                                            |
| AdCC4T    | 4          | 68956285         | TMPPRS11F | S80P              | NON_SYNONYMOUS_CODING | A                | G                | validated  | 7095               | 3.85%      | passenger    | N               | no                                     | no                                       | no                 | passenger        | 48.00%                          |                                                            |                                                            |
| AdCC4T    | 8          | 67062687         | TRIM55    | I324T             | NON_SYNONYMOUS_CODING | T                | C                | validated  | 2607               | 9.09%      | passenger    | D               | no                                     | no                                       | no                 | non-passenger    | 21.00%                          |                                                            |                                                            |
| AdCC4T    | 19         | 56952878         | ZNF667    | D624Y             | NON_SYNONYMOUS_CODING | C                | A                | validated  | 7439               | 31.13%     | passenger    | D               | no                                     | no                                       | no                 | non-passenger    | 100.00%                         |                                                            |                                                            |
| AdCC5T    | 1          | 19671683         | CAPZB     | E247K             | NON_SYNONYMOUS_CODING | C                | T                | validated  | 7515               | 22.86%     | passenger    | D               | no                                     | no                                       | no                 | non-passenger    | 46.00%                          |                                                            |                                                            |
| AdCC5T    | 1          | 19671686         | CAPZB     | V246I             | NON_SYNONYMOUS_CODING | C                | T                | validated  | 7217               | 21.96%     | passenger    | D               | no                                     | no                                       | no                 | non-passenger    | 45.00%                          |                                                            |                                                            |
| AdCC5T    | 2          | 234102590        | INPP5D    | T848M             | NON_SYNONYMOUS_CODING | C                | T                | validated  | 7574               | 46.96%     | passenger    | N               | no                                     | no                                       | no                 | passenger        | 91.00%                          |                                                            |                                                            |
| AdCC5T    | 18         | 48703554         | MEX3C     | A383P             | NON_SYNONYMOUS_CODING | C                | G                | validated  | 7204               | 6.75%      | passenger    | D               | no                                     | no                                       | no                 | non-passenger    | 11.00%                          |                                                            |                                                            |
| AdCC5T    | 11         | 1018408          | MUC6      | P1465T            | NON_SYNONYMOUS_CODING | G                | T                | not tested | not tested         | not tested | passenger    | N               | no                                     | no                                       | no                 | passenger        | 27.00%                          |                                                            |                                                            |
| AdCC5T    | 3          | 122680038        | SEMA5B    | Q79*              | STOP_GAINED           | G                | A                | validated  | 7518               | 44.72%     |              | A               | no                                     | no                                       | no                 | non-passenger    | 100.00%                         |                                                            |                                                            |
| AdCC5T    | 3          | 133664051        | SLCO2A1   | C450S             | NON_SYNONYMOUS_CODING | C                | G                | validated  | 7521               | 46.90%     | passenger    | D               | no                                     | no                                       | no                 | non-passenger    | 95.00%                          |                                                            |                                                            |
| AdCC5T    | 2          | 39278343         | SOS1      | M269K             | NON_SYNONYMOUS_CODING | A                | T                | validated  | 6276               | 54.46%     | passenger    | D               | no                                     | no                                       | no                 | non-passenger    | 87.00%                          |                                                            |                                                            |
| AdCC5T    | 1          | 32265412         | SPOCD1    | S594*             | STOP_GAINED           | G                | T                | validated  | 7808               | 45.61%     |              | A               | no                                     | no                                       | no                 | non-passenger    | 100.00%                         |                                                            |                                                            |
| AdCC5T    | 10         | 63170208         | TMEM26    | G327C             | NON_SYNONYMOUS_CODING | C                | A                | validated  | 7377               | 44.84%     | passenger    | N               | no                                     | no                                       | no                 | passenger        | 100.00%                         |                                                            |                                                            |
| AdCC5T    | 10         | 1123923          | WDR37     | L72P              | NON_SYNONYMOUS_CODING | T                | C                | validated  | 7787               | 43.87%     | passenger    | D               | no                                     | no                                       | no                 | non-passenger    | 100.00%                         |                                                            |                                                            |
| AdCC6T    | 10         | 72498632         | ADAMTS14  | P548L             | NON_SYNONYMOUS_CODING | C                | T                | validated  | 7621               | 34.47%     | passenger    | N               | no                                     | no                                       | no                 | passenger        | 45.00%                          |                                                            |                                                            |
| AdCC6T    | X          | 47428176         | ARAF      | A379V             | NON_SYNONYMOUS_CODING | C                | T                | validated  | 7233               | 0.19%      | driver       | D               | no                                     | no                                       | no                 | non-passenger    | 15.00%                          |                                                            |                                                            |
| AdCC6T    | X          | 49092016         | CCDC22    | .                 | START_GAINED          | C                | T                | validated  | 7769               | 41.68%     |              |                 | no                                     | no                                       | no                 | passenger        | 97.00%                          |                                                            |                                                            |
| AdCC6T    | 10         | 73572317         | CDH23     | E3157fs           | FRAME_SHIFT           | AG               | A                | validated  | 5941               | 35.28%     | .            | A               | no                                     | no                                       | no                 | non-passenger    | 77.00%                          |                                                            |                                                            |
| AdCC6T    | 12         | 107391316        | CRY1      | I481S             | NON_SYNONYMOUS_CODING | A                | C                | validated  | 7378               | 33.86%     | passenger    | D               | no                                     | no                                       | no                 | non-passenger    | 68.00%                          |                                                            |                                                            |
| AdCC6T    | 5          | 74041510         | GFM2      | I281T             | NON_SYNONYMOUS_CODING | A                | G                | validated  | 7850               | 32.84%     | passenger    | D               | no                                     | no                                       | no                 | non-passenger    | 100.00%                         |                                                            |                                                            |
| AdCC6T    | X          | 101969964        | GPRASP2   | S56F              | NON_SYNONYMOUS_CODING | C                | T                | validated  | 7233               | 27.75%     | passenger    | N               | no                                     | no                                       | no                 | passenger        | 75.00%                          |                                                            |                                                            |
| AdCC6T    | 1          | 201180040        | IGFN1     | G2007R            | NON_SYNONYMOUS_CODING | G                | A                | not tested | not tested         | not tested | passenger    | N               | no                                     | no                                       | no                 | passenger        | 21.00%                          |                                                            |                                                            |
| AdCC6T    | 16         | 87436663         | MAP1LC3B  | Y113C             | NON_SYNONYMOUS_CODING | A                | G                | validated  | 7531               | 19.51%     | passenger    | D               | no                                     | no                                       | no                 | non-passenger    | 51.00%                          |                                                            |                                                            |
| AdCC6T    | 11         | 59834493         | MS4A3     | L141I             | NON_SYNONYMOUS_CODING | C                | A                | not tested | not tested         | not tested | passenger    | N               | no                                     | no                                       | no                 | passenger        | 97.00%                          |                                                            |                                                            |
| AdCC6T    | 3          | 195512597        | MUC4      | P1952S            | NON_SYNONYMOUS_CODING | G                | A                | not tested | not tested         | not tested | passenger    | N               | no                                     | no                                       | no                 | passenger        | 46.00%                          | yes                                                        |                                                            |
| AdCC6T    | 20         | 32664866         | RALY      | G231S             | NON_SYNONYMOUS_CODING | G                | A                | validated  | 5294               | 1.38%      | passenger    | N               | no                                     | no                                       | no                 | passenger        | 82.00%                          |                                                            |                                                            |
| AdCC6T    | 4          | 2514847          | RNF4      | G138*             | STOP_GAINED           | G                | T                | validated  | 6105               | 8.89%      |              | D               | no                                     | no                                       | no                 | non-passenger    | 13.00%                          |                                                            |                                                            |
| AdCC6T    | 22         | 19163933         | SLC25A1   | .                 | SPLICE_SITE_DONOR     | C                | A                | validated  | 7103               | 33.93%     |              | D               | no                                     | no                                       | no                 | non-passenger    | 100.00%                         |                                                            |                                                            |
| AdCC6T    | 4          | 122681514        | TMEM155   | T110P             | NON_SYNONYMOUS_CODING | T                | G                | validated  | 7732               | 33.79%     | passenger    | N               | no                                     | no                                       | no                 | passenger        | 91.00%                          |                                                            |                                                            |
| AdCC6T    | 17         | 5037195          | USP6      | R133K             | NON_SYNONYMOUS_CODING | G                | A                | validated  | 7777               | 2.58%      | passenger    | D               | no                                     | no                                       | yes                | non-passenger    | 15.00%                          |                                                            |                                                            |
| AdCC6T    | 19         | 50482425         | VRK3      | N451H             | NON_SYNONYMOUS_CODING | T                | G                | validated  | 7862               | 33.55%     | passenger    | D               | no                                     | no                                       | no                 | non-passenger    | 71.00%                          |                                                            |                                                            |
| AdCC6T    | 7          | 57193788         | ZNF479    | C67R              | NON_SYNONYMOUS_CODING | A                | G                | validated  | 7545               | 20.38%     | passenger    | N               | no                                     | no                                       | no                 | passenger        | 75.00%                          |                                                            |                                                            |
| AdCC8T    | 17         | 4542725          | ALOX15    | G135S             | NON_SYNONYMOUS_CODING | C                | T                | validated  | 7347               | 0.12%      | passenger    | D               | no                                     | no                                       | no                 | non-passenger    | 57.00%                          |                                                            | yes                                                        |



| Sample ID | Chromosome | Genomic position | Gene     | Amino acid change | Effect                | Reference allele | Alternate allele | Validation | Sequence depth (x) | MAF        | CHASM Breast | Mutation Taster | 5000S - Lawrence et al. (Nature, 2014) | 127 genes; Kandath et al. (Nature, 2013) | Cancer Gene Census | Consensus impact | Cancer cell fraction (ABSOLUTE) | Mutated in salivary gland AdCCs; Ho et al (Nat Genet 2013) | Mutated in salivary gland AdCCs; Stephens et al (JCI 2013) |
|-----------|------------|------------------|----------|-------------------|-----------------------|------------------|------------------|------------|--------------------|------------|--------------|-----------------|----------------------------------------|------------------------------------------|--------------------|------------------|---------------------------------|------------------------------------------------------------|------------------------------------------------------------|
| AdCC8T    | 17         | 48681557         | CACNA1G  | T1404M            | NON_SYNONYMOUS_CODING | C                | T                | validated  | 5570               | 11.65%     | passenger    | D               | no                                     | no                                       | no                 | non-passenger    | 100.00%                         |                                                            |                                                            |
| AdCC8T    | 17         | 39296361         | KRTAP4-6 | S127P             | NON_SYNONYMOUS_CODING | A                | G                | not tested | not tested         | not tested | passenger    | P               | no                                     | no                                       | no                 | passenger        | 100.00%                         | yes                                                        |                                                            |
| AdCC8T    | 17         | 39412119         | KRTAP9-9 | S161Y             | NON_SYNONYMOUS_CODING | C                | A                | not tested | not tested         | not tested | passenger    | N               | no                                     | no                                       | no                 | passenger        | 41.00%                          |                                                            |                                                            |
| AdCC8T    | 6          | 24411023         | MRS2     | Q161H             | NON_SYNONYMOUS_CODING | G                | T                | validated  | 7956               | 29.30%     | passenger    | N               | no                                     | no                                       | no                 | passenger        | 90.00%                          |                                                            |                                                            |
| AdCC8T    | 4          | 100518256        | MTTP     | Y341*             | STOP_GAINED           | C                | G                | validated  | 7460               | 30.43%     |              | A               | no                                     | no                                       | no                 | non-passenger    | 100.00%                         | yes                                                        |                                                            |
| AdCC8T    | 12         | 20709592         | PDE3A    | .                 | SPLICE_SITE_ACCEPTOR  | A                | G                | validated  | 7810               | 28.48%     |              | D               | no                                     | no                                       | no                 | non-passenger    | 77.00%                          |                                                            |                                                            |
| AdCC8T    | 4          | 20512185         | SLIT2    | R332*             | STOP_GAINED           | C                | T                | validated  | 7606               | 2.41%      |              | A               | no                                     | no                                       | no                 | non-passenger    | 16.00%                          |                                                            |                                                            |
| AdCC8T    | 19         | 58385546         | ZNF814   | D404E             | NON_SYNONYMOUS_CODING | G                | T                | not tested | not tested         | not tested | passenger    | N               | no                                     | no                                       | no                 | passenger        | 33.00%                          |                                                            |                                                            |
| AdCC9T    | X          | 74273274         | ABCB7    | E731D             | NON_SYNONYMOUS_CODING | C                | A                | validated  | 7611               | 26.95%     | passenger    | D               | no                                     | no                                       | no                 | non-passenger    | 62.00%                          |                                                            |                                                            |
| AdCC9T    | 7          | 95157557         | ASB4     | C307Y             | NON_SYNONYMOUS_CODING | G                | A                | validated  | 7588               | 43.45%     | passenger    | D               | no                                     | no                                       | no                 | non-passenger    | 99.00%                          |                                                            |                                                            |
| AdCC9T    | 7          | 140453154        | BRAF     | D594G             | NON_SYNONYMOUS_CODING | T                | C                | validated  | 7632               | 42.18%     | driver       | D               | yes                                    | yes                                      | yes                | non-passenger    | 100.00%                         |                                                            |                                                            |
| AdCC9T    | 4          | 1388944          | CRIPAK   | M215I             | NON_SYNONYMOUS_CODING | G                | A                | not tested | not tested         | not tested | passenger    | N               | no                                     | yes                                      | no                 | non-passenger    | 70.00%                          |                                                            |                                                            |
| AdCC9T    | 12         | 49432644         | MLL2     | A2832fs           | FRAME_SHIFT           | G                | GCAAAT           | validated  | 7449               | 41.71%     |              | A               | yes                                    | yes                                      | yes                | non-passenger    | 42.00%                          |                                                            |                                                            |
| AdCC9T    | 11         | 1265992          | MUC5B    | R2631S            | NON_SYNONYMOUS_CODING | C                | A                | not tested | not tested         | not tested | passenger    | N               | no                                     | no                                       | no                 | passenger        | 35.00%                          |                                                            |                                                            |
| AdCC9T    | 1          | 145323667        | NBPF10   | D1168E            | NON_SYNONYMOUS_CODING | C                | G                | not tested | not tested         | not tested | passenger    | N               | no                                     | no                                       | no                 | passenger        | 30.00%                          |                                                            |                                                            |
| AdCC9T    | 21         | 46936005         | SLC19A1  | L448*             | STOP_GAINED           | A                | T                | validated  | NA                 | NA         |              | D               | no                                     | no                                       | no                 | non-passenger    | 52.00%                          |                                                            |                                                            |
| AdCC9T    | 7          | 100228635        | TFR2     | S383G             | NON_SYNONYMOUS_CODING | T                | C                | validated  | NA                 | NA         | passenger    | N               | no                                     | no                                       | no                 | passenger        | 37.00%                          |                                                            |                                                            |
| AdCC9T    | 5          | 82789383         | VCAN     | R155M             | NON_SYNONYMOUS_CODING | G                | T                | validated  | 7785               | 47.32%     | passenger    | D               | no                                     | no                                       | no                 | non-passenger    | 100.00%                         |                                                            |                                                            |
| AdCC10T   | 22         | 29758989         | AP1B1    | .                 | SPLICE_SITE_DONOR     | C                | G                | not tested | not tested         | not tested |              | D               | no                                     | no                                       | no                 | non-passenger    | 100.00%                         |                                                            |                                                            |
| AdCC10T   | 15         | 28483865         | HERC2    | R1211C            | NON_SYNONYMOUS_CODING | G                | A                | not tested | not tested         | not tested | passenger    | D               | no                                     | no                                       | no                 | non-passenger    | 19.00%                          |                                                            |                                                            |
| AdCC10T   | 17         | 30351758         | LRR37B   | L597I             | NON_SYNONYMOUS_CODING | C                | A                | not tested | not tested         | not tested | passenger    | N               | no                                     | no                                       | no                 | passenger        | 33.00%                          |                                                            |                                                            |
| AdCC10T   | 1          | 11194409         | MTOR     | R1749G            | NON_SYNONYMOUS_CODING | G                | C                | validated  | 3828               | 76.91%     | driver       | D               | yes                                    | yes                                      | no                 | non-passenger    | 44.00%                          |                                                            |                                                            |
| AdCC10T   | 15         | 52643623         | MYO5A    | R1226H            | NON_SYNONYMOUS_CODING | C                | T                | validated  | 7299               | 43.57%     | passenger    | D               | no                                     | no                                       | no                 | non-passenger    | 100.00%                         |                                                            |                                                            |
| AdCC10T   | X          | 71359543         | NHSL2    | Y715*             | STOP_GAINED           | C                | A                | validated  | 7280               | 0.18%      |              | D               | no                                     | no                                       | no                 | non-passenger    | 96.00%                          |                                                            |                                                            |
| AdCC10T   | 3          | 97868656         | OR5H14   | R143W             | NON_SYNONYMOUS_CODING | C                | T                | not tested | not tested         | not tested | passenger    | N               | no                                     | no                                       | no                 | passenger        | 35.00%                          |                                                            |                                                            |
| AdCC10T   | 1          | 158517511        | OR6Y1    | V129L             | NON_SYNONYMOUS_CODING | C                | A                | validated  | 7454               | 0.15%      | passenger    | N               | no                                     | no                                       | no                 | passenger        | 39.00%                          |                                                            |                                                            |
| AdCC10T   | 2          | 205990357        | PARD3B   | R444*             | STOP_GAINED           | C                | T                | validated  | 7330               | 45.93%     |              | A               | no                                     | no                                       | no                 | non-passenger    | 77.00%                          |                                                            |                                                            |
| AdCC10T   | 2          | 198267483        | SF3B1    | R625H             | NON_SYNONYMOUS_CODING | C                | T                | validated  | 7378               | 40.09%     | passenger    | D               | yes                                    | yes                                      | yes                | non-passenger    | 100.00%                         | yes                                                        | yes                                                        |
| AdCC11T   | X          | 100749038        | ARMCX4   | A1821V            | NON_SYNONYMOUS_CODING | C                | T                | not tested | not tested         | not tested | passenger    | N               | no                                     | no                                       | no                 | passenger        | 100.00%                         |                                                            |                                                            |
| AdCC11T   | 7          | 100645731        | MUC12    | E4106K            | NON_SYNONYMOUS_CODING | G                | A                | not tested | not tested         | not tested | passenger    | N               | no                                     | no                                       | no                 | passenger        | 48.00%                          |                                                            |                                                            |
| AdCC11T   | 2          | 109988132        | SH3RF3   | V314M             | NON_SYNONYMOUS_CODING | G                | A                | validated  | 3696               | 8.58%      | passenger    | D               | no                                     | no                                       | no                 | non-passenger    | 27.00%                          |                                                            |                                                            |
| AdCC11T   | 5          | 175717557        | SIMC1    | H325Y             | NON_SYNONYMOUS_CODING | C                | T                | not tested | not tested         | not tested | passenger    | N               | no                                     | no                                       | no                 | passenger        | 62.00%                          |                                                            |                                                            |
| AdCC11T   | 19         | 38385094         | WDR87    | Y417N             | NON_SYNONYMOUS_CODING | A                | T                | validated  | 7429               | 23%        | passenger    | D               | no                                     | no                                       | no                 | non-passenger    | 58.00%                          | yes                                                        |                                                            |
| AdCC11T   | X          | 128881719        | XPNPEP2  | E209D             | NON_SYNONYMOUS_CODING | G                | T                | validated  | 6715               | 8.13%      | passenger    | N               | no                                     | no                                       | no                 | passenger        | 79.00%                          |                                                            |                                                            |

Martelotto et al - Supplementary Table S5

| Sample ID | Chromosome | Genomic position | Gene     | Amino acid change | Effect                | Reference allele | Alternate allele | Validation | Sequence depth (x) | MAF        | CHASM Breast | Mutation Taster | 5000S - Lawrence et al. (Nature, 2014) | 127 genes; Kandoth et al. (Nature, 2013) | Cancer Gene Census | Consensus impact | Cancer cell fraction (ABSOLUTE) | Mutated in salivary gland AdCCs; Ho et al (Nat Genet 2013) | Mutated in salivary gland AdCCs; Stephens et al (JCI 2013) |
|-----------|------------|------------------|----------|-------------------|-----------------------|------------------|------------------|------------|--------------------|------------|--------------|-----------------|----------------------------------------|------------------------------------------|--------------------|------------------|---------------------------------|------------------------------------------------------------|------------------------------------------------------------|
| AdCC11T   | 7          | 99669556         | ZNF3     | N184S             | NON_SYNONYMOUS_CODING | T                | C                | validated  | 3642               | 46.46%     | passenger    | N               | no                                     | no                                       | no                 | passenger        | 100.00%                         |                                                            |                                                            |
| AdCC12T   | 11         | 72425256         | ARAP1    | S207C             | NON_SYNONYMOUS_CODING | G                | C                | validated  | 7302               | 41.93%     | passenger    | N               | no                                     | no                                       | no                 | passenger        | 100.00%                         |                                                            |                                                            |
| AdCC12T   | 15         | 41246442         | CHAC1    | T125M             | NON_SYNONYMOUS_CODING | C                | T                | validated  | 7633               | 48.66%     | passenger    | D               | no                                     | no                                       | no                 | non-passenger    | 85.00%                          |                                                            |                                                            |
| AdCC12T   | 19         | 1026673          | CNN2     | Q5E               | NON_SYNONYMOUS_CODING | C                | G                | not tested | not tested         | not tested | passenger    | N               | no                                     | no                                       | no                 | passenger        | 100.00%                         |                                                            |                                                            |
| AdCC12T   | X          | 69665197         | DLG3     | A49V              | NON_SYNONYMOUS_CODING | C                | T                | not tested | not tested         | not tested | passenger    | D               | no                                     | no                                       | no                 | non-passenger    | 51.00%                          |                                                            |                                                            |
| AdCC12T   | 4          | 153244232        | FBXW7    | D642G             | NON_SYNONYMOUS_CODING | T                | C                | validated  | 4475               | 67.71%     | driver       | D               | yes                                    | yes                                      | yes                | non-passenger    | 61.00%                          | yes                                                        |                                                            |
| AdCC12T   | 12         | 13716611         | GRIN2B   | H1187Q            | NON_SYNONYMOUS_CODING | G                | C                | validated  | 4999               | 64.31%     | passenger    | D               | no                                     | no                                       | no                 | non-passenger    | 98.00%                          | yes                                                        |                                                            |
| AdCC12T   | 10         | 124909622        | HMX2     | N269H             | NON_SYNONYMOUS_CODING | A                | C                | validated  | 7336               | 46.32%     | passenger    | D               | no                                     | no                                       | no                 | non-passenger    | 81.00%                          |                                                            |                                                            |
| AdCC12T   | 8          | 28928248         | KIF13B   | F1752L            | NON_SYNONYMOUS_CODING | A                | G                | not tested | not tested         | not tested | passenger    | D               | no                                     | no                                       | no                 | non-passenger    | 98.00%                          |                                                            |                                                            |
| AdCC12T   | 17         | 39240577         | KRTAP4-7 | Y40C              | NON_SYNONYMOUS_CODING | A                | G                | not tested | not tested         | not tested | passenger    | N               | no                                     | no                                       | no                 | passenger        | 100.00%                         |                                                            |                                                            |
| AdCC12T   | 10         | 129905764        | MKI67    | S1447N            | NON_SYNONYMOUS_CODING | C                | T                | validated  | 5134               | 23.33%     | passenger    | N               | no                                     | no                                       | no                 | passenger        | 100.00%                         |                                                            |                                                            |
| AdCC12T   | 3          | 195510827        | MUC4     | A2542T            | NON_SYNONYMOUS_CODING | C                | T                | not tested | not tested         | not tested | passenger    | P               | no                                     | no                                       | no                 | passenger        | 100.00%                         |                                                            |                                                            |
| AdCC12T   | 10         | 104158170        | NFKB2    | Y294C             | NON_SYNONYMOUS_CODING | A                | G                | validated  | 6929               | 18.14%     | passenger    | D               | no                                     | no                                       | yes                | non-passenger    | 29.00%                          |                                                            |                                                            |
| AdCC12T   | 18         | 21897344         | OSBPL1A  | W251*             | STOP_GAINED           | C                | T                | validated  | 7670               | 49.75%     |              | D               | no                                     | no                                       | no                 | non-passenger    | 72.00%                          |                                                            |                                                            |
| AdCC12T   | 22         | 50728805         | PLXNB2   | G70V              | NON_SYNONYMOUS_CODING | C                | A                | validated  | 6432               | 44.96%     | passenger    | D               | no                                     | no                                       | no                 | non-passenger    | 100.00%                         |                                                            |                                                            |
| AdCC12T   | 17         | 74288749         | QRICH2   | Q521*             | STOP_GAINED           | G                | A                | validated  | 4415               | 32.23%     |              | A               | no                                     | no                                       | no                 | non-passenger    | 94.00%                          |                                                            |                                                            |
| AdCC12T   | 12         | 122265762        | SETD1B   | .                 | SPLICE_SITE_DONOR     | T                | G                | validated  | 7587               | 45.89%     |              | D               | no                                     | no                                       | no                 | non-passenger    | 100.00%                         |                                                            |                                                            |
| AdCC12T   | 4          | 144446639        | SMARCA5  | R186*             | STOP_GAINED           | C                | T                | validated  | 7570               | 50.61%     |              | A               | no                                     | no                                       | no                 | non-passenger    | 96.00%                          |                                                            |                                                            |
| AdCC12T   | 15         | 62939556         | TLN2     | V16A              | NON_SYNONYMOUS_CODING | T                | C                | validated  | 7580               | 46.48%     | passenger    | D               | no                                     | no                                       | no                 | non-passenger    | 92.00%                          |                                                            |                                                            |
| AdCC32T   | 4          | 47556924         | ATP10D   | R606Q             | NON_SYNONYMOUS_CODING | G                | A                | validated  | 7800               | 9.69%      | passenger    | D               | no                                     | no                                       | no                 | non-passenger    | 22.00%                          |                                                            |                                                            |
| AdCC32T   | 22         | 50169273         | BRD1     | F987fs            | FRAME_SHIFT           | AC               | A                | validated  | 7329               | 41.89%     | .            | D               | no                                     | no                                       | no                 | non-passenger    | 83.00%                          |                                                            |                                                            |
| AdCC32T   | 16         | 68842714         | CDH1     | T217fs            | FRAME_SHIFT           | CAG              | C                | validated  | 7415               | 42.16%     | .            | A               | yes                                    | yes                                      | yes                | non-passenger    | 68.00%                          |                                                            |                                                            |
| AdCC32T   | 13         | 53035380         | CKAP2    | H141R             | NON_SYNONYMOUS_CODING | A                | G                | not tested | not tested         | not tested | passenger    | N               | no                                     | no                                       | no                 | passenger        | 100.00%                         |                                                            |                                                            |
| AdCC32T   | 6          | 55128601         | HCRTR2   | R248H             | NON_SYNONYMOUS_CODING | G                | A                | validated  | 2659               | 85.37%     | passenger    | D               | no                                     | no                                       | no                 | non-passenger    | 96.00%                          |                                                            | yes                                                        |
| AdCC32T   | 12         | 113906056        | LHX5     | R184fs            | FRAME_SHIFT           | CG               | C                | validated  | 5971               | 40.13%     | .            | A               | no                                     | no                                       | no                 | non-passenger    | 68.00%                          |                                                            |                                                            |
| AdCC32T   | 6          | 135513475        | MYB      | I181V             | NON_SYNONYMOUS_CODING | A                | G                | validated  | 4424               | 74.93%     | passenger    | D               | no                                     | no                                       | yes                | non-passenger    | 100.00%                         | yes                                                        |                                                            |
| AdCC32T   | 1          | 247614650        | OR2B11   | L212S             | NON_SYNONYMOUS_CODING | A                | G                | validated  | 7580               | 14.46%     | passenger    | D               | no                                     | no                                       | no                 | non-passenger    | 27.00%                          |                                                            |                                                            |
| AdCC32T   | 11         | 56114217         | OR8K1    | N235Y             | NON_SYNONYMOUS_CODING | A                | T                | validated  | 7099               | 2.21%      | passenger    | N               | no                                     | no                                       | no                 | passenger        | 9.00%                           |                                                            |                                                            |
| AdCC32T   | 5          | 86658477         | RASA1    | L481P             | NON_SYNONYMOUS_CODING | T                | C                | validated  | 7671               | 40.79%     | passenger    | D               | yes                                    | no                                       | no                 | non-passenger    | 95.00%                          |                                                            |                                                            |
| AdCC32T   | 11         | 78614415         | TENM4    | T216M             | NON_SYNONYMOUS_CODING | G                | A                | validated  | 6678               | 37.87%     | passenger    | D               | no                                     | no                                       | no                 | non-passenger    | 100.00%                         |                                                            |                                                            |
| AdCC32T   | 10         | 70928298         | VPS26A   | M261L             | NON_SYNONYMOUS_CODING | A                | T                | validated  | 4765               | 13.03%     | passenger    | D               | no                                     | no                                       | no                 | non-passenger    | 58.00%                          |                                                            |                                                            |
| AdCC32T   | 17         | 1637508          | WDR81    | T1726R            | NON_SYNONYMOUS_CODING | C                | G                | validated  | 7476               | 42.19%     | passenger    | D               | no                                     | no                                       | no                 | non-passenger    | 75.00%                          |                                                            |                                                            |
| AdCC32T   | 5          | 751328           | ZDHC11B  | C194S             | NON_SYNONYMOUS_CODING | C                | G                | not tested | not tested         | not tested |              | N               | no                                     | no                                       | no                 | passenger        | 100.00%                         |                                                            |                                                            |

**Supplementary Table S6: Recurrent copy number gains and losses identified in AdCCs of the breast.**

| Copy number gains |           |                   |                       |                                                                                                                                                                                                                                                                                                                                                                                                                                                                                                                                                                                                                                                                                                                                                                                                                                                                                                                                                                           |
|-------------------|-----------|-------------------|-----------------------|---------------------------------------------------------------------------------------------------------------------------------------------------------------------------------------------------------------------------------------------------------------------------------------------------------------------------------------------------------------------------------------------------------------------------------------------------------------------------------------------------------------------------------------------------------------------------------------------------------------------------------------------------------------------------------------------------------------------------------------------------------------------------------------------------------------------------------------------------------------------------------------------------------------------------------------------------------------------------|
| Chromosome        | Cyto-band | Cases altered (n) | Sample IDs            | Genes                                                                                                                                                                                                                                                                                                                                                                                                                                                                                                                                                                                                                                                                                                                                                                                                                                                                                                                                                                     |
| 17                | q21.32    | 3                 | AdCC4, AdCC11, AdCC10 | ITGB3, C17orf57, CBX1, CDK5RAP3, COP22, KPNB1, LRRC46, MIR1203, MIR152, MRPL10, MRPL45P2, NFE2L1, NPEPPS, OSBPL7, PNPO, PRR15L, SCRIN2, SKAP1, SNX11, SP2, SP6, TBKBP1, TBX21, hsa-mir-1203, hsa-mir-52, HOXB1, HOXB13, HOXB13AS1, HOXB2, HOXB3, HOXB4, HOXB5, HOXB6, HOXB7, HOXB8, HOXB9, LOC404266, MIR10A, MIR196A1, MIR3185, PRAC, TTLL6, hsa-mir-10a, hsa-mir-196a-1, hsa-mir-3185, CALCOCO2, ATP5G1, B4GALNT2, GIP, IGF2BP1, SNF8, UBE2Z, GNGT2, ABI3, FLJ40194, PHOSPHO1, ZNF652                                                                                                                                                                                                                                                                                                                                                                                                                                                                                   |
| 17                | q21.33    | 3                 | AdCC4, AdCC11, AdCC10 | NGFR, NXPH3, PHB, SPOP, SLC35B1, FAM117A, KAT7, TAC4, ABCC3, ACSF2, ANKRD40, CACNA1G, CHAD, COL1A1, DLX3, DLX4, EME1, EPN3, FLJ45513, HILS1, ITGA3, LINC00483, LOC253962, LOC284080, LRRC59, LUC7L3, MRPL27, MYCBPAP, PDK2, PPP1R9B, RSAD1, SAMD14, SGCA, SPATA20, TMEM92, WFIKK2, XYLT2                                                                                                                                                                                                                                                                                                                                                                                                                                                                                                                                                                                                                                                                                  |
| 17                | q22       | 3                 | AdCC4, AdCC11, AdCC10 | C17orf67, DGKE, MIR3614, MTVR2, NOG, TRIM25, COIL, SCPEP1, AKAP1, RNF126P1, MSI2, MRPS23, CUEDC1, DYNLL2, SRSF1, VEZF1, MSX2P1, OR4D1, BZRAP1, C17orf47, EPX, HSF5, LOC100506779, LPO, MIR142, MIR4736, MKS1, MPO, MTMR4, OR4D2, RNF43, 4-Sep, SUPT4H1, TEX14, hsa-mir-142, PPM1E, RAD51C, GDDP1, MIR301A, MIR454, MIR4729, PRR11, SKA2, SMG8, TRIM37, YPEL2, hsa-mir-301a, hsa-mir-454                                                                                                                                                                                                                                                                                                                                                                                                                                                                                                                                                                                   |
| 17                | q23.1     | 3                 | AdCC4, AdCC11, AdCC10 | DHX40, CLTC, PTRH2, VMP1, MIR21, TUBD1, hsa-mir-21, RPS6KB1, CA4, HEATR6, LOC645638, LOC653653, MIR4737, RNFT1, TBC1D3P1-DHX40P1, USP32                                                                                                                                                                                                                                                                                                                                                                                                                                                                                                                                                                                                                                                                                                                                                                                                                                   |
| 17                | q23.2     | 3                 | AdCC4, AdCC11, AdCC10 | C17orf64, SCARNA20, APPBP2, PPM1D, BCAS3, C17orf82, NACA2, TBX2, TBX4, BRIP1, INTS2, MED13, EFCAB3, METTL2A, TBC1D3P2, TLK2, 10-Mar, MIR548W, MRC2, TANC2, hsa-mir-633                                                                                                                                                                                                                                                                                                                                                                                                                                                                                                                                                                                                                                                                                                                                                                                                    |
| 17                | q23.3     | 3                 | AdCC4, AdCC11, AdCC10 | ACE, CYB561, DCAF7, KCNH6, TACO1, MAP3K3, LIMD2, LOC729683, STRADA, CCDC47, C17orf72, CD79B, CSH1, CSH2, CSHL1, DDX42, ERN1, FTSJ3, GH1, GH2, ICAM2, PSMC5, SCN4A, SMARCD2, SNORA76, SNORD104, TCAM1P, TEX2, PECAM1, MILR1, POLG2, DDX5, MIR3064, MIR5047, CEP95, SMURF2                                                                                                                                                                                                                                                                                                                                                                                                                                                                                                                                                                                                                                                                                                  |
| 17                | q24.1     | 3                 | AdCC4, AdCC11, AdCC10 | AMZ2P1, GNA13, LOC146880, LRRC37A3, PLEKHM1P, hsa-mir-4315-2, RGS9, AXIN2, CEP112                                                                                                                                                                                                                                                                                                                                                                                                                                                                                                                                                                                                                                                                                                                                                                                                                                                                                         |
| 17                | q24.2     | 3                 | AdCC4, AdCC11, AdCC10 | APOH, PRKCA, MIR634, hsa-mir-634, CACNG1, CACNG4, CACNG5, HELZ, PSMD12, PITPNC1, BPTF, NOL11, SNORA38B, hsa-mir-548d2, C17orf58, KPNA2, LOC100499466, LOC440461, AMZ2, ARSG, SLC16A6, MIR635, PRKAR1A, WIPI1, hsa-mir-635, ABCA6, ABCA8, ABCA9, FAM20A, MIR4524A                                                                                                                                                                                                                                                                                                                                                                                                                                                                                                                                                                                                                                                                                                          |
| 17                | q24.3     | 3                 | AdCC4, AdCC11, AdCC10 | ABCA10, ABCA5, MAP2K6, KCNJ16, KCNJ2, KCNJ2-AS1, LINC00511, LOC100499467, SLC39A11, SOX9                                                                                                                                                                                                                                                                                                                                                                                                                                                                                                                                                                                                                                                                                                                                                                                                                                                                                  |
| 17                | q25.1     | 3                 | AdCC4, AdCC11, AdCC10 | C17orf80, CDC42EP4, COG1, CPSF4L, FAM104A, SDK2, SSTR2, LINC00469, BTBD17, CD300A, CD300C, CD300LB, DNAI2, GPR142, GPRC5C, KIF19, LOC400620, MGC16275, RPL38, TTYH2, CD300LD, C17orf77, CD300E, CD300LF, RAB37, ACOX1, ARMC7, ATP5H, C17orf109, C17orf110, C17orf28, CASKIN2, CDR2L, FADS6, FBF1, FDXR, GALK1, GGA3, GRB2, GRIN2C, H3F3B, HN1, ICT1, ITGB4, KCTD2, KIAA0195, LLGL2, LOC100287042, MIF4GD, MIR3615, MIR3678, MIR4738, MRPL38, MRPS7, MYO15B, NAT9, NT5C, NUP85, OTOP2, OTOP3, RECQL5, SAP30BP, SLC16A5, SLC25A19, SLC9A3R1, SUMO2, TMEM104, TRIM47, TRIM65, TSEN54, UNC13D, UNK, USH1G, WBP2                                                                                                                                                                                                                                                                                                                                                               |
| 12                | p11.1     | 2                 | AdCC4, AdCC10         | ALG10, SYT10                                                                                                                                                                                                                                                                                                                                                                                                                                                                                                                                                                                                                                                                                                                                                                                                                                                                                                                                                              |
| 12                | q12       | 2                 | AdCC4, AdCC10         | ALG10B                                                                                                                                                                                                                                                                                                                                                                                                                                                                                                                                                                                                                                                                                                                                                                                                                                                                                                                                                                    |
| 12                | p11.22    | 2                 | AdCC4, AdCC10         | CCDC91, FAR2, ERGIC2, OVCH1, TMTC1                                                                                                                                                                                                                                                                                                                                                                                                                                                                                                                                                                                                                                                                                                                                                                                                                                                                                                                                        |
| 12                | p11.21    | 2                 | AdCC4, AdCC10         | IPO8, AMN1, C12orf35, CAPRIN2, DDX11, DENND5B, FAM60A, FLJ13224, H3F3C, LOC100287314, LOC100506660, METTL20, TSPAN11, BICD1, FGD4, DNM1L, YARS2, PKP2                                                                                                                                                                                                                                                                                                                                                                                                                                                                                                                                                                                                                                                                                                                                                                                                                     |
| 17                | q11.1     | 2                 | AdCC4, AdCC10         | TBC1D3P5, KSR1                                                                                                                                                                                                                                                                                                                                                                                                                                                                                                                                                                                                                                                                                                                                                                                                                                                                                                                                                            |
| 17                | q11.2     | 2                 | AdCC4, AdCC10         | C17orf108, LGALS9, NOS2, NLK, PYY2, KRT18P55, PPY2, IFT20, MIR4723, POLDIP2, SARM1, SEBOX, TMEM199, TMEM97, TNFAIP1, VTN, SLC46A1, SLC13A2, FOXN1, UNC119, PIGS, ALDOC, SPAG5, KIAA0100, SGK494, SPAG5-AS1, SDF2, SUPT6H, PROCA1, C17orf63, NEK8, RAB34, RPL23A, SNORD42A, SNORD42B, SNORD4A, SNORD4B, TLCD1, TRAF4, ERAL1, MIR451A, MIR451B, hsa-mir-451, CRYBA1, DHRS13, FLOT2, MIR144, MIR4523, MIR4732, MYO18A, NUFIP2, PHF12, PIPOX, SEZ6, TAOK1, TIAF1, hsa-mir-144, ABHD15, ANKRD13B, CORO6, EFCAB5, GIT1, SSH2, TP53I13, MIR3184, MIR423, NSRP1, hsa-mir-3184, hsa-mir-423, SLC6A4, BLMH, TMIGD1, ADAP2, ATAD5, CPD, CRLF3, DPRXP4, GOSR1, LRRC37BP1, RNF135, SH3GL1P2, SUZ12P, TBC1D29, TEFM, MIR4733, NF1, EVI2A, EVI2B, OMG, RAB11FIP4, MIR4724, MIR193A, hsa-mir-193a, MIR4725, C17orf79, MIR365B, hsa-mir-365-2, UTP6, ARGFXP2, LRRC37B, RHOT1, SH3GL1P1, SUZ12, C17orf75, MIR632, PSMD11, RHBDL3, ZNF207, hsa-mir-632, ACCN1, CDK5R1, MYO1D, SPACA3, TMEM98 |

| Copy number gains |          |                   |               |                                                                                                                                                                                                                                                                                                                                                                                                                                                                                                                                                                                                                                                                                                                                                                                                                                                                                                                                                                                                                                                                             |
|-------------------|----------|-------------------|---------------|-----------------------------------------------------------------------------------------------------------------------------------------------------------------------------------------------------------------------------------------------------------------------------------------------------------------------------------------------------------------------------------------------------------------------------------------------------------------------------------------------------------------------------------------------------------------------------------------------------------------------------------------------------------------------------------------------------------------------------------------------------------------------------------------------------------------------------------------------------------------------------------------------------------------------------------------------------------------------------------------------------------------------------------------------------------------------------|
| Chromosome        | Cytoband | Cases altered (n) | Sample IDs    | Genes                                                                                                                                                                                                                                                                                                                                                                                                                                                                                                                                                                                                                                                                                                                                                                                                                                                                                                                                                                                                                                                                       |
| 17                | q12      | 2                 | AdCC4, AdCC10 | AA06, CCL2, CCL7, CCL11, CCL8, CCL13, CCL1, C17orf102, TMEM132E, CCT6B, ZNF830, LIG3, RAD51D, RAD51L3-RFFL, RFFL, FNDC8, NLE1, UNC45B, SLC35G3, SLFN11, SLFN12, SLFN13, SLFN5, SLFN12L, AP2B1, GAS2L2, PEX12, RASL10B, SLFN14, SNORD7, C17orf50, MMP28, TAF15, C17orf66, CCL5, AATF, CCL14, CCL14-CCL15, CCL15, CCL16, CCL18, CCL23, CCL3, CCL3L1, CCL3L3, CCL4, CCL4L1, CCL4L2, DHRS11, GGNBP2, LHX1, LYZL6, MRM1, MYO19, PIGW, RDM1, TBC1D3B, TBC1D3C, TBC1D3G, TBC1D3H, ZNHIT3, MIR2909, hsa-mir-2909, ACACA, C17orf78, TADA2A, DUSP14, SYNRG, DDX52, HNF1B, LOC284100, LOC440434, MRPL45, TBC1D3, TBC1D3F, ARHGAP23, C17orf96, C17orf98, CISD3, CWC25, FBXO47, GPR179, LASP1, LOC100505576, MIR4726, MIR4727, MIR4734, MLLT6, PCGF2, PIP4K2B, PSMB3, RPL23, SNORA21, SOCS7, SRCIN1, ARL5C, CACNB1, FBXL20, FLJ43826, LOC100131347, PLXDC1, RPL19, STAC2, MED1, CDK12, ERBB2, GRB7, IKZF3, MIEN1, MIR4728, NEUROD2, PGAP3, PNMT, PPP1R1B, STARD3, TCAP, ZBP2, GSDMB, ORMDL3, LRRC3C                                                                                      |
| 17                | q21.1    | 2                 | AdCC4, AdCC10 | GSDMA, PSMD3, CSF3, MED24, SNORD124, CASC3, MSL1, NR1D1, RAPGEFL1, THRA, WIPF2                                                                                                                                                                                                                                                                                                                                                                                                                                                                                                                                                                                                                                                                                                                                                                                                                                                                                                                                                                                              |
| 17                | q21.2    | 2                 | AdCC4, AdCC10 | CDC6, GJD3, IGFBP4, RARA, TNS4, TOP2A, CCR7, KRT10, KRT12, KRT222, KRT24, KRT25, KRT26, KRT27, KRT28, SMARCE1, TMEM99, KRT20, KRT23, KRT39, KRT40, KRTAP1-1, KRTAP1-3, KRTAP1-5, KRTAP2-1, KRTAP2-2, KRTAP2-4, KRTAP3-1, KRTAP3-2, KRTAP3-3, KRTAP4-1, KRTAP4-11, KRTAP4-12, KRTAP4-2, KRTAP4-3, KRTAP4-4, KRTAP4-5, KRTAP4-6, KRTAP4-7, KRTAP4-8, KRTAP4-9, KRTAP9-1, KRTAP9-2, KRTAP9-3, KRTAP9-4, KRTAP9-8, KRTAP9-9, LOC730755, KRTAP16-1, KRTAP17-1, KRT13, KRT14, KRT15, KRT16, KRT17, KRT19, KRT31, KRT32, KRT33A, KRT33B, KRT34, KRT35, KRT36, KRT37, KRT38, KRT42P, KRT9, LOC100505782, LOC147093, EIF1, GAST, HAP1, ACLY, CNP, DNAJC7, FKBP10, JUP, KLHL10, KLHL11, LEPREL4, NT5C3L, TTC25, NKIRAS2, ATP6V0A1, CCR10, CNTNAP1, COASY, DHX58, EZH1, FAM134C, GHDC, HCRT, HSD17B1, HSPB9, KAT2A, KCN4, MLX, NAGLU, PLEKHH3, PSMC3IP, PTRF, RAB5C, STAT3, STAT5A, STAT5B, TUBG1, TUBG2, ZNF385C                                                                                                                                                                      |
| 17                | q21.31   | 2                 | AdCC4, AdCC10 | AARSD1, AOC2, AOC3, AOC4, ARL4D, BECN1, BRCA1, C17orf105, CCDC56, CNTD1, DHX8, DUSP3, ETV4, G6PC, IFI35, LOC100130581, LOC100190938, LOC388387, MEOX1, MIR2117, MPP3, NBR1, NBR2, PSME3, RAMP2, RND2, RPL27, RUNDC1, SOST, TMEM106A, VAT1, VPS25, WNK4, hsa-mir-2117, CD300LG, MPP2, ADAM11, ASB16, ATXN7L3, C17orf104, C17orf53, C17orf65, CCDC43, DBF4B, FAM171A2, FAM215A, FZD2, G6PC3, GJC1, GPATCH8, GRN, HDAC5, HIGD1B, ITGA2B, LSM12, NAGS, PPY, PYY, RUNDC3A, SLC25A39, SLC4A1, TMEM101, TMUB2, UBTf, EFTUD2, C1QL1, CCDC103, DCAKD, GFAP, KIF18B, NMT1, ACBD4, ARHGAP27, ARL17A, ARL17B, C17orf46, C17orf69, CRHR1, FMNL1, HEXIM1, HEXIM2, IMP5, KIAA1267, LOC100128977, LOC100130148, LOC100133991, LOC644172, LOC644246, LRRC37A, LRRC37A2, LRRC37A4, MAP3K14, MAPT, MGC57346, MIR4315-1, MIR4315-2, NSF, NSFP1, PLCD3, PLEKHM1, STH, WNT3, hsa-mir-4315-1                                                                                                                                                                                                       |
| 17                | q21.32   | 2                 | AdCC4, AdCC10 | CDC27, GOSR2, MYL4, RPRML, WNT9B                                                                                                                                                                                                                                                                                                                                                                                                                                                                                                                                                                                                                                                                                                                                                                                                                                                                                                                                                                                                                                            |
| 17                | q21.33   | 2                 | AdCC4, AdCC10 | TOB1, LOC400604, NME1, NME1-NME2, SPAG9, NME2, MBTD1, UTP18, CA10                                                                                                                                                                                                                                                                                                                                                                                                                                                                                                                                                                                                                                                                                                                                                                                                                                                                                                                                                                                                           |
| 17                | q22      | 2                 | AdCC4, AdCC10 | KIF2B, LOC100506650, TOM1L1, COX11, HLF, STXBP4, MMD, TMEM100, PCTP, ANKFN1                                                                                                                                                                                                                                                                                                                                                                                                                                                                                                                                                                                                                                                                                                                                                                                                                                                                                                                                                                                                 |
| 17                | q25.1    | 2                 | AdCC4, AdCC10 | AANAT, CDK3, CYGB, EVPL, EXOC7, FAM100B, FOXJ1, GALR2, LOC100507218, LOC100507246, PRCD, PRPSAP1, QRICH2, RHBDF2, RNF157, SNORD1A, SNORD1B, SNORD1C, SPHK1, SRP68, ST6GALNAC2, TEN1, TEN1-CDK3, UBE2O, ZACN, MXRA7, ST6GALNAC1, JMDJ6, METTL23, MFSD11, MIR636, SRSF2, hsa-mir-636                                                                                                                                                                                                                                                                                                                                                                                                                                                                                                                                                                                                                                                                                                                                                                                          |
| 17                | q25.2    | 2                 | AdCC4, AdCC10 | LINC00338, MGAT5B, SEC14L1, SCARNA16, SEPT9                                                                                                                                                                                                                                                                                                                                                                                                                                                                                                                                                                                                                                                                                                                                                                                                                                                                                                                                                                                                                                 |
| 17                | q25.3    | 2                 | AdCC4, AdCC10 | AFMID, BIRC5, C17orf99, CYTH1, DNAH17, FLJ45079, LOC100131096, LOC100507351, MIR4316, PGS1, SOCS3, SYNGR2, TK1, TMC6, TMC8, TMEM235, TNRC6C, USP36, hsa-mir-4316, C1QTNF1, CANT1, CARD14, CBX2, CBX4, CBX8, CCDC40, EIF4A3, ENGASE, ENPP7, GAA, LGALS3BP, LOC100507410, LOC100653515, MIR4739, RBF3X, RNF213, SGSH, SLC26A11, TBC1D16, TIMP2, LOC100294362, AATK, AATKAS1, ACTG1, ALYREF, ANAPC11, ARHGDI, ARL16, ASPSCR1, AZI1, BAHCC1, BAIAP2, C17orf56, C17orf70, C17orf89, C17orf90, CCDC137, CCDC57, CHMP6, DCXR, DUS1L, ENDOV, FAM195B, FASN, FLJ90757, FSCN2, GCGR, GPS1, HGS, LINC00482, LRRC45, MAFG, MAFGAS1, MIR1250, MIR3065, MIR3186, MIR338, MIR4730, MIR4740, MIR657, MRPL12, MYADML2, NOTUM, NPB, NPLOC4, NPTX1, P4HB, PCYT2, PDE6G, PPP1R27, PYCR1, RAC3, RFNG, RPTOR, SIRT7, SLC25A10, SLC38A10, STRA13, TMEM105, TSPAN10, hsa-mir-1250, hsa-mir-3065, hsa-mir-3186, hsa-mir-338, hsa-mir-657, B3GNTL1, C17orf101, C17orf62, CD7, CSNK1D, FLJ43681, FN3K, FN3KRP, FOXK2, HEXDC, METRNL, NARF, RAB40B, SECTM1, SLC16A3, TBCD, TEX19, UTS2R, WDR45L, ZNF750 |

| Copy number losses |            |                   |                                    |                                                                                                                                                                                                                                                                                                                                                                                                                                                                                                                                                                                                                                                                                                                                                                                                                                               |
|--------------------|------------|-------------------|------------------------------------|-----------------------------------------------------------------------------------------------------------------------------------------------------------------------------------------------------------------------------------------------------------------------------------------------------------------------------------------------------------------------------------------------------------------------------------------------------------------------------------------------------------------------------------------------------------------------------------------------------------------------------------------------------------------------------------------------------------------------------------------------------------------------------------------------------------------------------------------------|
| Chromosome         | Cyto-bands | Cases altered (n) | Sample IDs                         | Genes                                                                                                                                                                                                                                                                                                                                                                                                                                                                                                                                                                                                                                                                                                                                                                                                                                         |
| 12                 | q12        | 5                 | AdCC3, AdCC8, AdCC32, AdCC2, AdCC1 | ARID2, LOC400027, SCAF11                                                                                                                                                                                                                                                                                                                                                                                                                                                                                                                                                                                                                                                                                                                                                                                                                      |
| 12                 | q13.11     | 5                 | AdCC3, AdCC8, AdCC32, AdCC2, AdCC1 | SLC38A1, SLC38A2, SLC38A4, AMIGO2, FAM113B, LOC100233209, MIR4698, ENDOU, HDAC7, RAPGEF3, RPAP3, SLC48A1, VDR, COL2A1, SENP1, TMEM106C, ASB8, C12orf68, H1FNT, OR10AD1, PFKM, ZNF641, ANP32D, C12orf54, OR8S1, LALBA, KANSL2, MIR1291, SNORA34, hsa-mir-1291, SNORA2A, CCNT1, SNORA2B                                                                                                                                                                                                                                                                                                                                                                                                                                                                                                                                                         |
| 12                 | q13.12     | 5                 | AdCC3, AdCC8, AdCC32, AdCC2, AdCC1 | ADCY6, LOC255411, MIR4701, CACNB3, DDX23, RND1, ARF3, CCDC65, DDN, FKBP11, MLL2, PRKAG1, RHEBL1, WNT1, WNT10B, DHH, LMBR1L, TUBA1B, TUBA1A, TUBA1C, PRPH, C1QL4, DNAJC22, FAM186B, FMNL3, KCNH3, LOC100335030, MCRS1, PRPF40B, SPATS2, TROAP, TM6IM6, NCKAP5L, ACCN2, AQP2, AQP5, AQP6, BCDIN3D, FAIM2, LOC100286844, LOC283332, RACGAP1, SMARCD1, GPD1, C12orf62, CERS5, LIMA1, DIP2B, FAM186A, LARP4, MIR1293, hsa-mir-1293, ATF1, METTL7A, TMPRSS12, HIGD1C, SLC11A2, LETMD1, CSRN2P2, TFCP2                                                                                                                                                                                                                                                                                                                                               |
| 12                 | q13.13     | 5                 | AdCC3, AdCC8, AdCC32, AdCC2, AdCC1 | POU6F1, DAZAP2, SMAGP, BIN2, CELA1, GALNT6, SLC4A8, SCN8A, ANKRD33, FIGNL2, ACVR1B, ACVRL1, C12orf44, EIF4B, GRASP, KRT1, KRT18, KRT2, KRT3, KRT4, KRT5, KRT6A, KRT6B, KRT6C, KRT7, KRT71, KRT72, KRT73, KRT74, KRT75, KRT76, KRT77, KRT78, KRT79, KRT8, KRT80, KRT81, KRT82, KRT83, KRT84, KRT85, KRT86, LOC283403, LOC283404, NR4A1, CSAD, ESPL1, IGFBP6, ITGB7, LOC283335, MFSD5, RARG, SOAT2, SPRYD3, TENC1, ZNF740, PFDN5, C12orf10, AAAS, SP7, SP1, AMHR2, PRR13, PCBP2, MAP3K12, TARBP2, NPFF, ATF7, LOC100652999, ATP5G2, CALCOCO1, CBX5, FLJ12825, HNRNPA1, HNRNPA1P10, HOTAIR, HOXC10, HOXC11, HOXC12, HOXC13, HOXC4, HOXC5, HOXC6, HOXC8, HOXC9, LOC100240734, LOC100240735, LOC400043, MIR196A2, MIR3198-2, MIR615, NFE2, SMUG1, hsa-mir-196a-2, hsa-mir-615, COPZ1, MIR148B, hsa-mir-148b, GPR84, ZNF385A, ITGA5, GTSF1, NCKAP1L |
| 12                 | q13.2      | 5                 | AdCC3, AdCC8, AdCC32, AdCC2, AdCC1 | DCD, GLYCAM1, LACRT, MUCL1, PDE1B, PPP1R1A, KIAA0748, NEUROD4, OR10A7, OR6C1, OR6C3, OR6C6, OR6C74, OR9K2, OR6C65, OR6C75, OR6C2, OR6C4, OR6C68, OR6C70, OR6C76, METTL7B, OR10P1, BLOC1S1, BLOC1S1-RDH5, CD63, CDK2, DGKA, DNAJC14, ERBB3, GDF11, IKZF4, ITGA7, MMP19, ORMDL2, PA2G4, PMEL, RAB5B, RDH5, RPL41, RPS26, SARNP, SUOX, TMEM198B, WIBG, ZC3H10, ESYT1, MYL6B, MYL6, SMARCC2, RNF41                                                                                                                                                                                                                                                                                                                                                                                                                                                |
| 12                 | q13.3      | 5                 | AdCC3, AdCC8, AdCC32, AdCC2, AdCC1 | OBFC2B, SLC39A5, ANKRD52, COQ10A, CS, CNPY2, PAN2, IL23A, STAT2, APOF, TIMELESS, MIP, SPRYD4, GLS2, BAZ2A, RBMS2, ATP5B, SNORD59B, SNORD59A, PTGES3, NACA, PRIM1, HSD17B6, SDR9C7, GPR182, LRP1, MIR1228, MYO1A, NAB2, NDUFA4L2, NXPH4, RDH16, SHMT2, STAC3, STAT6, TAC3, TMEM194A, ZBTB39, hsa-mir-1228, R3HDM2, ARHGAP9, DCTN2, DDIT3, DTX3, GLI1, INHBC, INHBE, KIF5A, MARS, MBD6, PIP4K2C, hsa-mir-616, ARHGEF25, SLC26A10, B4GALNT1, OS9                                                                                                                                                                                                                                                                                                                                                                                                 |
| 12                 | q14.1      | 5                 | AdCC3, AdCC8, AdCC32, AdCC2, AdCC1 | AGAP2, AVIL, CDK4, CYP27B1, LOC100130776, 9-Mar, METTL1, METTL21B, TSFM, TSPAN31, CTDSP2, LOC100506844, MIR26A2, hsa-mir-26a-2, XRCC6BP1                                                                                                                                                                                                                                                                                                                                                                                                                                                                                                                                                                                                                                                                                                      |
| 12                 | q12        | 4                 | AdCC3, AdCC8, AdCC32, AdCC2        | NELL2, TMEM117, DBX2, PLEKHA8P1, RACGAP1P, ANO6, RNY5                                                                                                                                                                                                                                                                                                                                                                                                                                                                                                                                                                                                                                                                                                                                                                                         |
| 12                 | q12        | 3                 | AdCC3, AdCC8, AdCC32               | ADAMTS20, PUS7L, IRAK4, TWF1                                                                                                                                                                                                                                                                                                                                                                                                                                                                                                                                                                                                                                                                                                                                                                                                                  |
| 12                 | q14.1      | 3                 | AdCC3, AdCC2, AdCC1                | LRIG3, SLC16A7                                                                                                                                                                                                                                                                                                                                                                                                                                                                                                                                                                                                                                                                                                                                                                                                                                |
| 12                 | p11.1      | 2                 | AdCC3, AdCC32                      | ALG10, SYT10                                                                                                                                                                                                                                                                                                                                                                                                                                                                                                                                                                                                                                                                                                                                                                                                                                  |
| 12                 | q12        | 2                 | AdCC3, AdCC32                      | ALG10B, CPNE8, KIF21A, ABCD2, C12orf40, SLC2A13, LRRK2, CNTN1, PDZRN4, GXYLT1, YAF2, ZCRB1, PPHLN1, PRICKLE1                                                                                                                                                                                                                                                                                                                                                                                                                                                                                                                                                                                                                                                                                                                                  |
| X                  | q21.1      | 2                 | AdCC3, AdCC1                       | RPS6KA6, hsa-mir-548i-4, HDX, UBE2DNL, APOOL, SATL1                                                                                                                                                                                                                                                                                                                                                                                                                                                                                                                                                                                                                                                                                                                                                                                           |
| 9                  | q32        | 2                 | AdCC5, AdCC8                       | ZNF618, AMBP, COL27A1, KIF12, MIR455, hsa-mir-455, AKNA, ATP6V1G1, C9orf91, DFNB31, LOC100505478, ORM1, ORM2, TNFSF15, TNFSF8                                                                                                                                                                                                                                                                                                                                                                                                                                                                                                                                                                                                                                                                                                                 |
| 9                  | q33.1      | 2                 | AdCC5, AdCC8                       | 1-Dec, TNC, LINC00474, PAPP4, ASTN2, LOC100128505, TRIM32, DBC1, SNORA70C, TLR4                                                                                                                                                                                                                                                                                                                                                                                                                                                                                                                                                                                                                                                                                                                                                               |
| 9                  | q33.2      | 2                 | AdCC5, AdCC8                       | CDK5RAP2, MIR147A, hsa-mir-147, C5, CNTRL, FBXW2, LOC100288842, LOC253039, MEGF9, PHF19, PSMD5, TRAF1, RAB14, GSN, GGTA1P, STOM, DAB2IP, TLL11, LHX6, MIR4478, MORN5, NDUFA8, RBM18, MRRF, OR1B1, OR1J1, OR1J2, OR1J4, OR1L8, OR1N1, OR1N2, OR1Q1, PTGS1, OR1L1, OR1L3, OR1L4, OR1L6, OR5C1, OR1K1, PDCL, RC3H2, SNORD90, ZBTB6, ZBTB26, RABGAP1, GPR21                                                                                                                                                                                                                                                                                                                                                                                                                                                                                       |
| 9                  | q33.3      | 2                 | AdCC5, AdCC8                       | MIR600, MIR600HG, STRBP, hsa-mir-600, CRB2, DENND1A, MIR601, hsa-mir-601, GPR144, LHX2, LOC100129034, MIR181A2, MIR181A2HG, MIR181B2, NEK6, NR5A1, NR6A1, OLFML2A, PSMB7, RPL35, WDR38, hsa-mir-181a-2, hsa-mir-181b-2, ARPC5L, GOLGA1, SCAI, PPP6C, RABEPK, HSPA5, GAPVD1, MAPKAP1, FAM125B, PBX3, NRON, LMX1B, RALGPS1, ZBTB34, ZBTB43, ANGPTL2, GARNL3, SLC2A8, ZNF79, RPL12, SNORA65, LRSAM1, FAM129B                                                                                                                                                                                                                                                                                                                                                                                                                                     |

| Copy number losses |           |                   |               |                                                                                                                                                                                                                                                                                                                                                                                                                                                                                                                                                                                                                                                                                                                                                                                                                                                                                                                                                                                                                                                                                                                                                                                                         |
|--------------------|-----------|-------------------|---------------|---------------------------------------------------------------------------------------------------------------------------------------------------------------------------------------------------------------------------------------------------------------------------------------------------------------------------------------------------------------------------------------------------------------------------------------------------------------------------------------------------------------------------------------------------------------------------------------------------------------------------------------------------------------------------------------------------------------------------------------------------------------------------------------------------------------------------------------------------------------------------------------------------------------------------------------------------------------------------------------------------------------------------------------------------------------------------------------------------------------------------------------------------------------------------------------------------------|
| Chromosome         | Cytobands | Cases altered (n) | Sample IDs    | Genes                                                                                                                                                                                                                                                                                                                                                                                                                                                                                                                                                                                                                                                                                                                                                                                                                                                                                                                                                                                                                                                                                                                                                                                                   |
| 9                  | q34.11    | 2                 | AdCC5, AdCC8  | STXBP1, AK1, C9orf117, C9orf16, CDK9, CERCAM, CIZ1, COQ4, DNM1, DPM2, ENG, FAM102A, FPGS, GOLGA2, LCN2, LOC100289019, LOC389791, MIR199B, MIR219-2, MIR2861, MIR2964A, MIR3154, MIR3911, MIR3960, MIR4672, NAIF1, PIP5KL1, PTGES2, PTRH1, SH2D3C, SLC25A25, SLC27A4, ST6GALNAC4, ST6GALNAC6, SWI5, TOR2A, TRUB2, TTC16, URM1, hsa-mir-199b, hsa-mir-219-2, hsa-mir-2861, hsa-mir-3154                                                                                                                                                                                                                                                                                                                                                                                                                                                                                                                                                                                                                                                                                                                                                                                                                   |
| 12                 | q14.1     | 2                 | AdCC2, AdCC1  | FAM19A2, USP15, C12orf61, MIRLET7I, MON2, PPM1H, hsa-let-7i                                                                                                                                                                                                                                                                                                                                                                                                                                                                                                                                                                                                                                                                                                                                                                                                                                                                                                                                                                                                                                                                                                                                             |
| 12                 | q14.2     | 2                 | AdCC2, AdCC1  | AVPR1A, DPY19L2, TMEM5                                                                                                                                                                                                                                                                                                                                                                                                                                                                                                                                                                                                                                                                                                                                                                                                                                                                                                                                                                                                                                                                                                                                                                                  |
| 12                 | q21.31    | 2                 | AdCC1, AdCC12 | C12orf26, CCDC59, TMTC2, SLC6A15, TSPAN19, ALX1, LRR1Q1, RASSF9, NTS, MGAT4C                                                                                                                                                                                                                                                                                                                                                                                                                                                                                                                                                                                                                                                                                                                                                                                                                                                                                                                                                                                                                                                                                                                            |
| 12                 | q21.32    | 2                 | AdCC1, AdCC12 | C12orf50, MIR548AL, MKRN9P, C12orf29                                                                                                                                                                                                                                                                                                                                                                                                                                                                                                                                                                                                                                                                                                                                                                                                                                                                                                                                                                                                                                                                                                                                                                    |
| 17                 | p13.3     | 2                 | AdCC4, AdCC10 | ABR, BHLHA9, C17orf97, CRK, DBIL5P, DOC2B, DPH1, FAM101B, FAM57A, GEMIN4, GLOD4, HIC1, INPP5K, LOC100306951, LOC100506388, MIR132, MIR212, MIR22, MIR22HG, MIR3183, MYO1C, NXN, OVCA2, PIPNA, PRPF8, RILP, RNMTL1, RPA1, RPH3AL, RTN4RL1, SCARF1, SERPINF1, SERPINF2, SLC43A2, SMG6, SMYD4, TIMM22, TLCD2, TUSC5, VPS53, WDR81, YWHAE, hsa-mir-132, hsa-mir-212, hsa-mir-22, hsa-mir-3183, KIAA0664, LOC284009, METTL16, MIR1253, MNT, PAFAH1B1, RAP1GAP2, SGSM2, SNORD91A, SNORD91B, SRR, TSR1, hsa-mir-1253, OR1A1, OR1A2, OR1D2, OR1D4, OR1D5, OR1G1, OR3A1, OR3A2, OR3A4P                                                                                                                                                                                                                                                                                                                                                                                                                                                                                                                                                                                                                           |
| 17                 | p13.2     | 2                 | AdCC4, AdCC10 | ASPA, OR1E1, OR1E2, OR3A3, SPATA22, TRPV3, ANKFY1, ATP2A3, C17orf85, CAMKK1, CTNS, CYB5D2, GGT6, GSG2, ITGAE, MYBBP1A, P2RX1, P2RX5, P2RX5-TAX1BP3, SHPK, SMTNL2, SPNS2, SPNS3, TAX1BP3, TMEM93, TRPV1, UBE2G1, ZZEF1, ALOX15, ARRB2, C17orf107, CAMTA2, CHRNE, CXCL16, ENO3, GLTPD2, GP1BA, GPR172B, INCA1, KIF1C, MED11, MINK1, PELP1, PFN1, PLD2, PSMB6, RNF167, SLC25A11, SPAG7, TM4SF5, USP6, VMO1, ZFP3, ZMYND15, ZNF232, ZNF594, LOC100130950, SCIMP, RABEP1, NUP88, RPAIN, C1QBP, DHX33, DERL2, LOC728392, MIS12, NLRP1, LOC339166, WSCD1, AIPL1, FAM64A, PITPNM3, KIAA0753                                                                                                                                                                                                                                                                                                                                                                                                                                                                                                                                                                                                                     |
| 17                 | p13.1     | 2                 | AdCC4, AdCC10 | TXNDC17, MED31, C17orf100, ALOX15P1, MIR4520A, MIR4520B, ALOX12, ALOX12P2, FBXO39, LOC100506713, SLC13A5, TEKT1, XAF1, ACADVL, ACAP1, ASGR1, ASGR2, BCL6B, C17orf49, C17orf61, C17orf61-PLSCR3, C17orf74, C17orf81, CD68, CHRN1, CLDN7, CLEC10A, CTDNEP1, DLG4, DVL2, EIF4A1, EIF5A, FGF11, FXR2, GABARAP, GPS2, KCTD11, MIR195, MIR324, MIR497, MIR497HG, MPDU1, NEURL4, NLGN2, PHF23, PLSCR3, POLR2A, RNASEK, RNASEK-C17ORF49, SAT2, SENP3, SENP3-EIF4A1, SHBG, SLC16A11, SLC16A13, SLC2A4, SLC35G6, SNORA48, SNORA67, SNORD10, SOX15, SPEM1, TMEM102, TMEM95, TNFSF12, TNFSF12-TNFSF13, TNFSF13, TNK1, YBX2, ZBTB4, hsa-mir-195, hsa-mir-324, hsa-mir-497, ATP1B2, TP53, WRAP53, EFN3, DNAH2, CHD3, CNTROB, CYB5D1, GUCY2D, KCNAB3, KDM6B, LOC284023, LSMD1, RPL29P2, SCARNA21, TMEM88, TRAPPC1, ALOX12B, ALOX15B, ALOXE3, ARHGEF15, AURKB, C17orf59, CTC1, HES7, KRBA2, LINC00324, LOC100128288, MIR3676, MIR4314, MIR4521, ODF4, PER1, PFAS, RANGRF, SLC25A35, TMEM107, VAMP2, hsa-mir-4314, NDEL1, RNF222, RPL26, MYH10, CCDC42, MFSD6L, PIK3R6, SPDYE4, NTN1, PIK3R5, STX8, DHRS7C, GAS7, GLP2R, MYH1, MYH13, MYH2, MYH4, MYH8, RCVRN, USP43, WDR16, MYH3, SCO1, C17orf48, LOC100289255, TMEM220 |
| 17                 | p12       | 2                 | AdCC4, AdCC10 | PIRT, SHISA6, DNAH9, ZNF18, MAP2K4, FLJ34690, MIR744, hsa-mir-744, MYOCD, ARHGAP44, ELAC2, CDRT15P1, COX10, HS3ST3A1, hsa-mir-548h-3, CDRT15, HS3ST3B1, MGC12916, CDRT7, MIR4731, PMP22, CDRT4, FAM18B2, FAM18B2-CDRT4, TEKT3, ADORA2B, CDRT1, CDRT15P2, MEIS3P1, NCOR1, TBC1D26, TRIM16, TTC19, ZNF286A, ZSWIM7                                                                                                                                                                                                                                                                                                                                                                                                                                                                                                                                                                                                                                                                                                                                                                                                                                                                                        |
| 17                 | p11.2     | 2                 | AdCC4, AdCC10 | CENPV, MIR1288, PIGL, hsa-mir-1288, UBB, TRPV2, C17orf76-AS1, SNORD49B, SNORD49A, FAM211A, SNORD65, ZNF287, ZNF624, CCDC144A, FAM106CP, KRT16P2, TNFRSF13B, USP32P1, MPRIP, ATPAF2, C17orf39, COPS3, FLCN, LRRC48, MED9, MIR33B, NT5M, PEMT, PLD6, RAI1, RASD1, SMCR5, SMCR9, SREBF1, TOM1L2, hsa-mir-33b, DRG2, ALKBH5, CCDC144B, EVPLL, FAM106A, FLII, LGALS9C, LGLL1, LOC339240, MYO15A, SHMT1, SMCR7, SMCR8, TOP3A, USP32P2                                                                                                                                                                                                                                                                                                                                                                                                                                                                                                                                                                                                                                                                                                                                                                         |
| X                  | p21.1     | 2                 | AdCC3, AdCC1  | hsa-mir-548f-5                                                                                                                                                                                                                                                                                                                                                                                                                                                                                                                                                                                                                                                                                                                                                                                                                                                                                                                                                                                                                                                                                                                                                                                          |
